# Supplementary material for: New Histamine-Related Five-Membered N-Heterocycle Derivatives as Carbonic Anhydrase I Activators
Source: MDPI journal article supplement (doi:10.3390/molecules27020545), 2022-01-15

# **Supplementary Materials: New Histamine-Related Five-Membered N-Heterocycle Derivatives as Carbonic Anhydrase I Activators**

Niccolò Chiaramonte, Alessio Gabellini, Andrea Angeli, Gianluca Bartolucci, Laura Braconi, Silvia Dei, Elisabetta Teodori, Claudiu T. Supuran and Maria Novella Romanelli

**<sup>1</sup>H and <sup>13</sup>C-NMR spectra of the final compounds**

$^1\text{H-NMR}$  ( $\text{CDCl}_3$ )

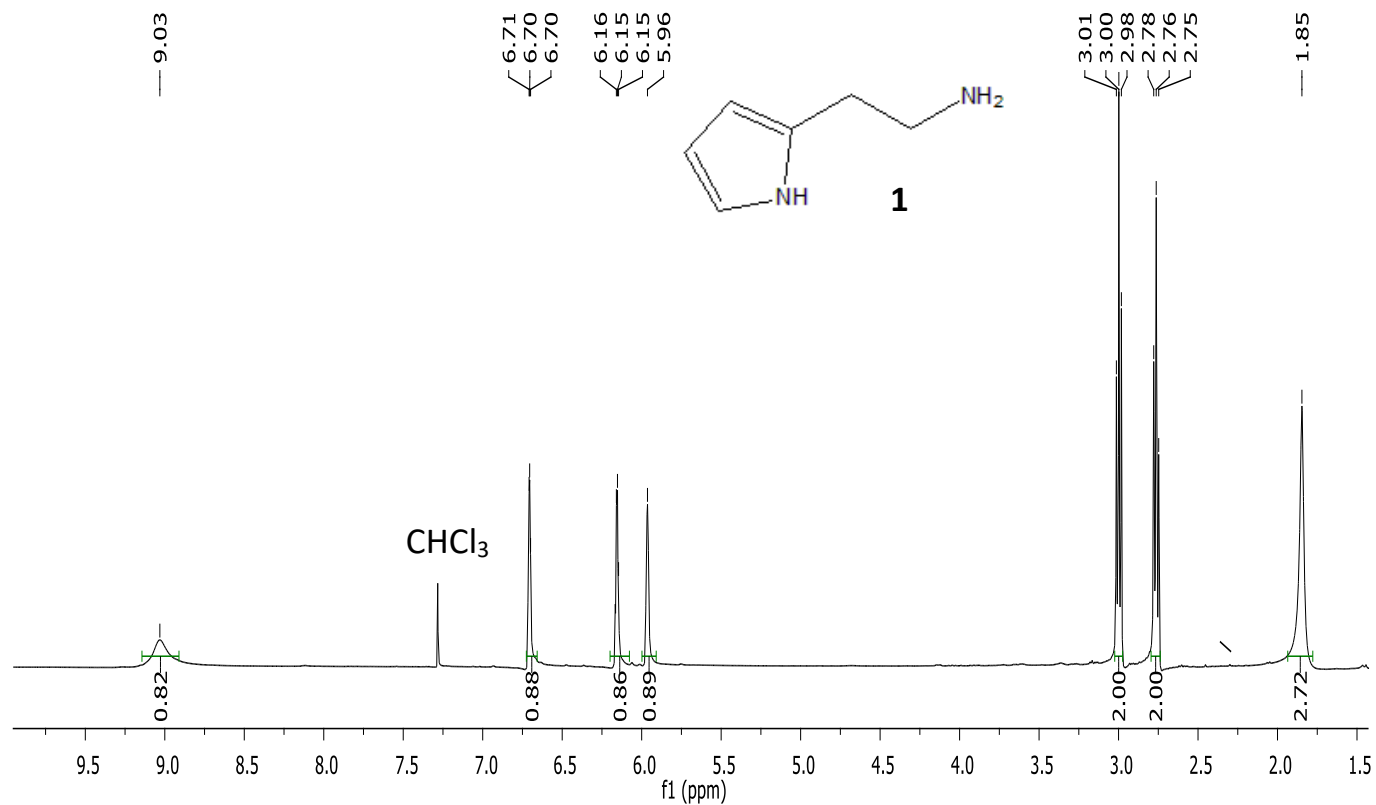

$^{13}\text{C-NMR}$   
(APT,  $\text{CDCl}_3$ )

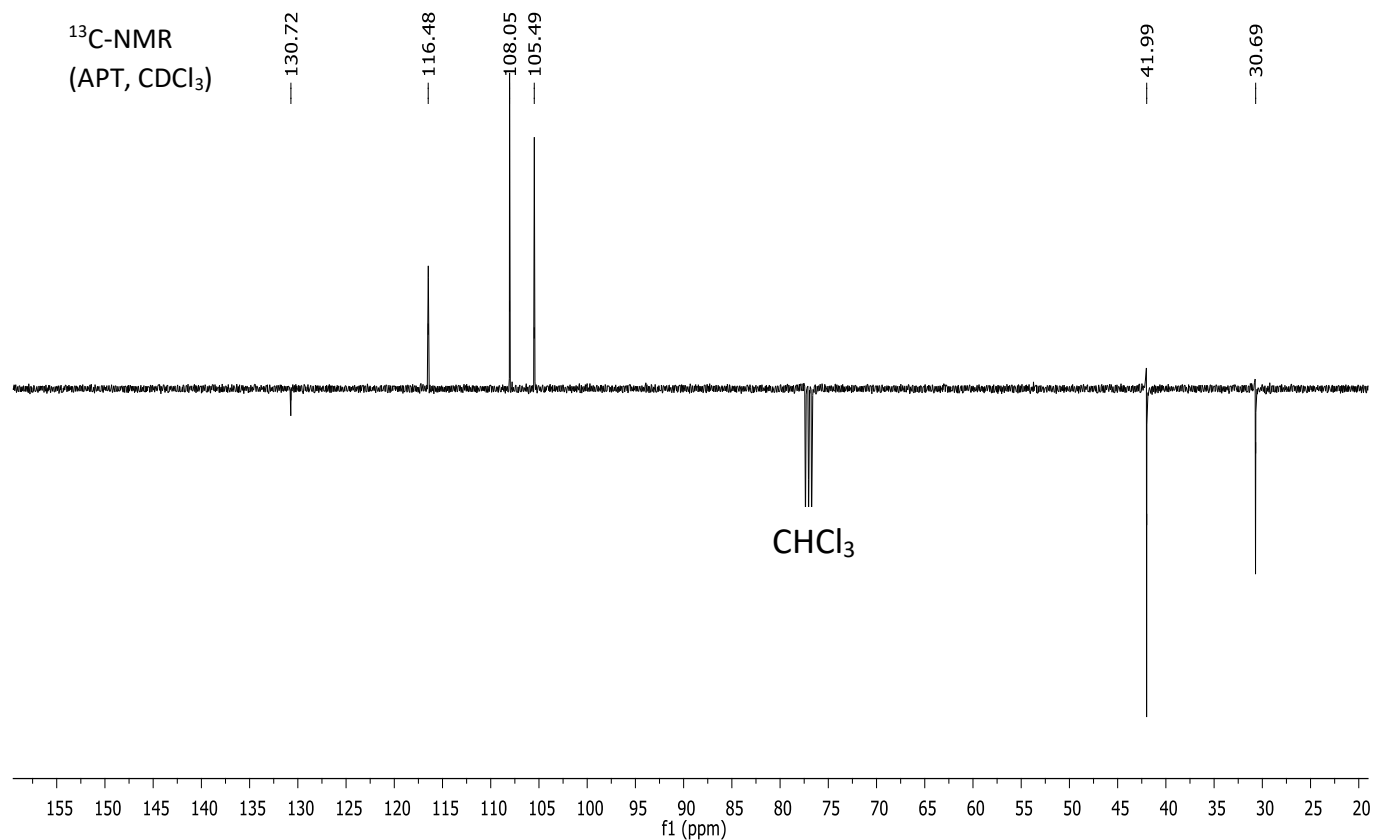

$^1\text{H}$ -NMR ( $\text{D}_2\text{O}$ )

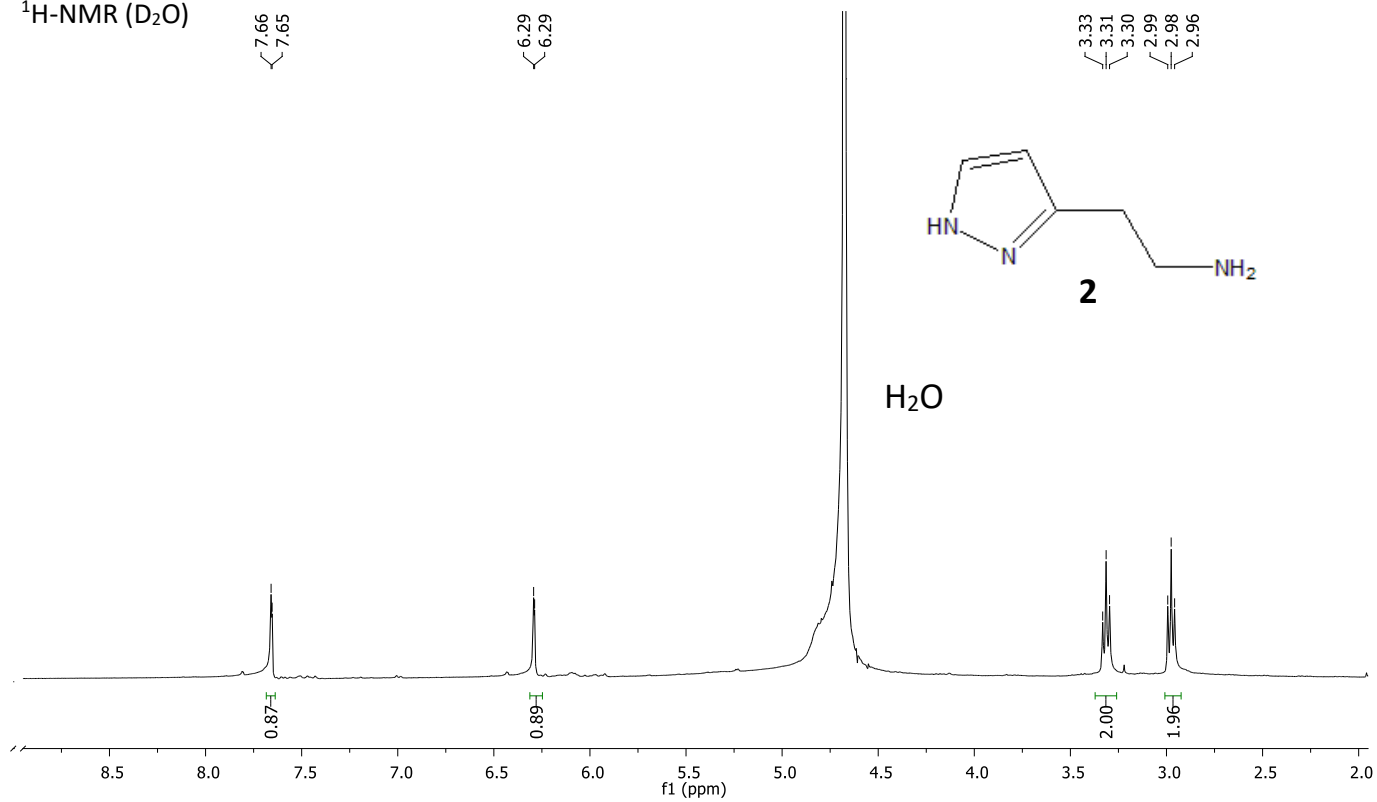

$^{13}\text{C}$ -NMR  
(APT,  $\text{D}_2\text{O}$ )

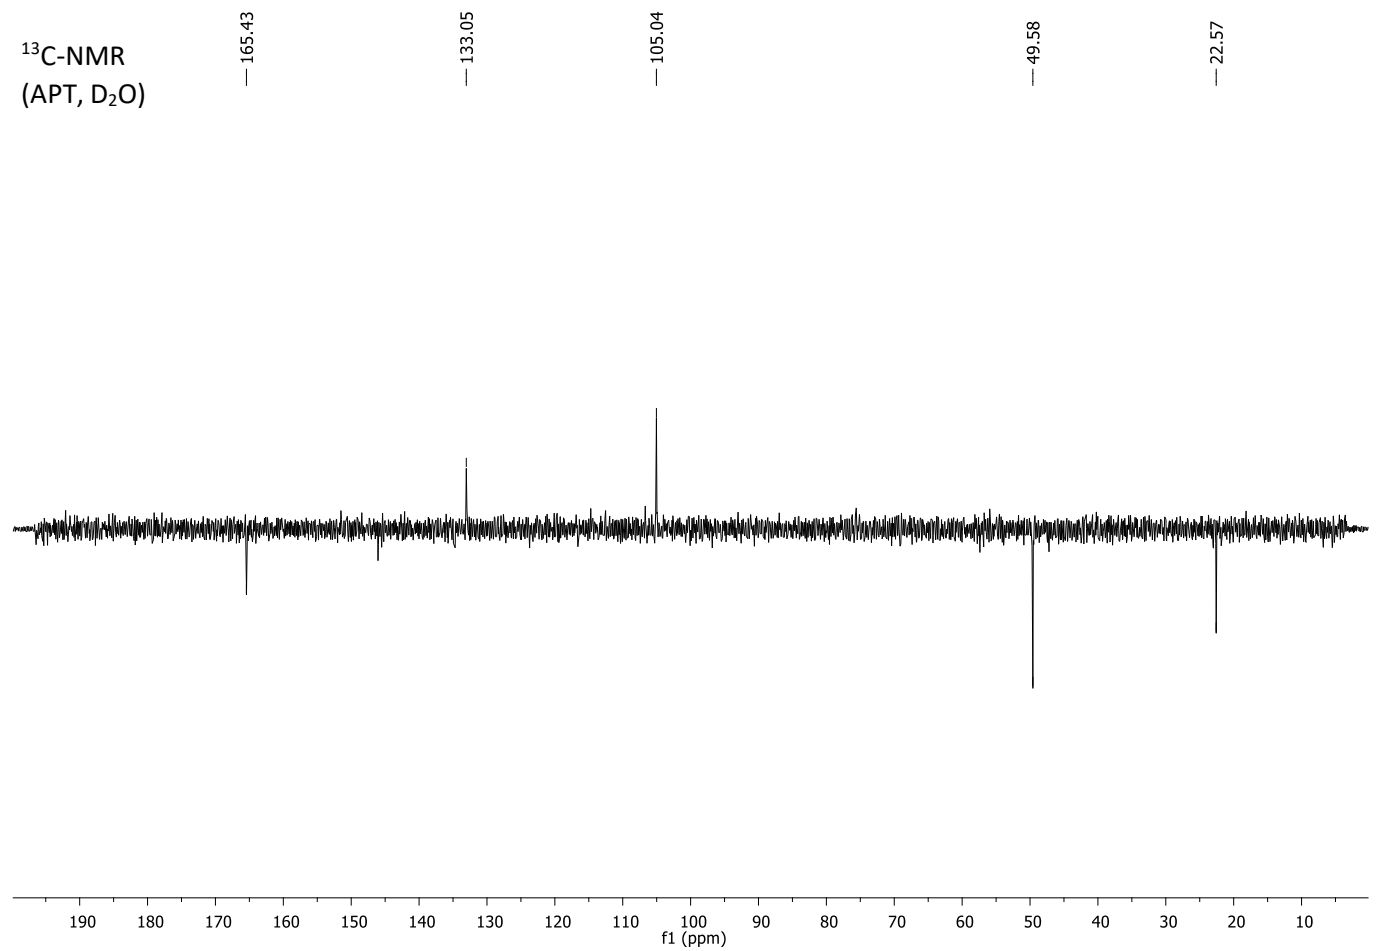

<sup>1</sup>H-NMR (CD<sub>3</sub>OD)

— 7.47

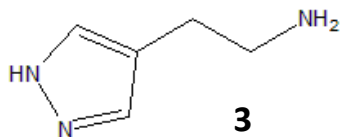

2.87  
2.85  
2.84  
2.69  
2.67  
2.66

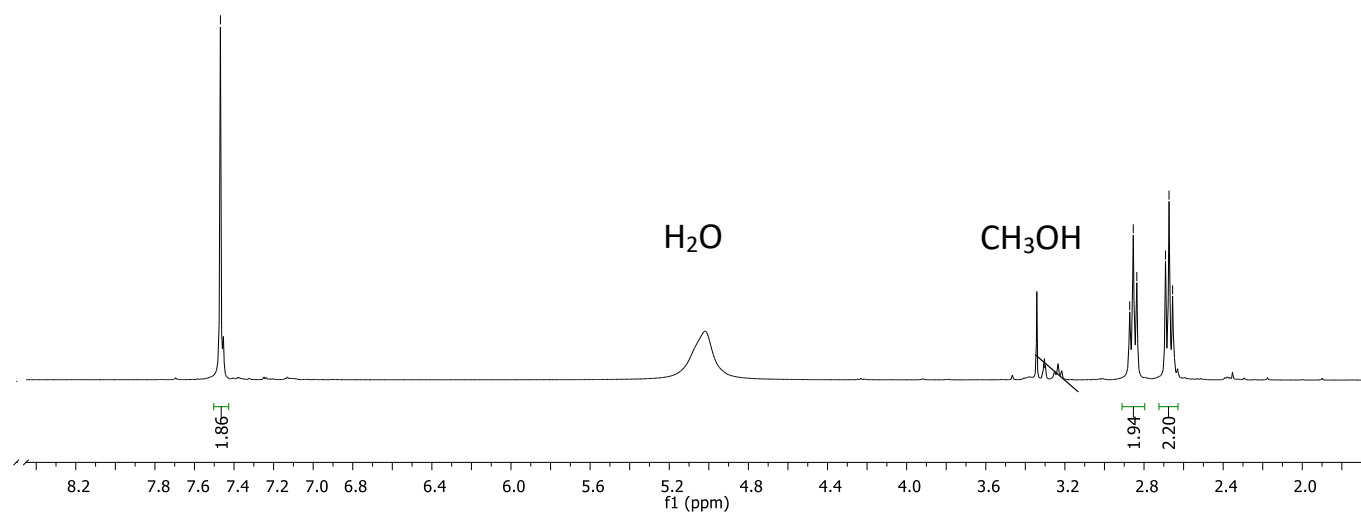

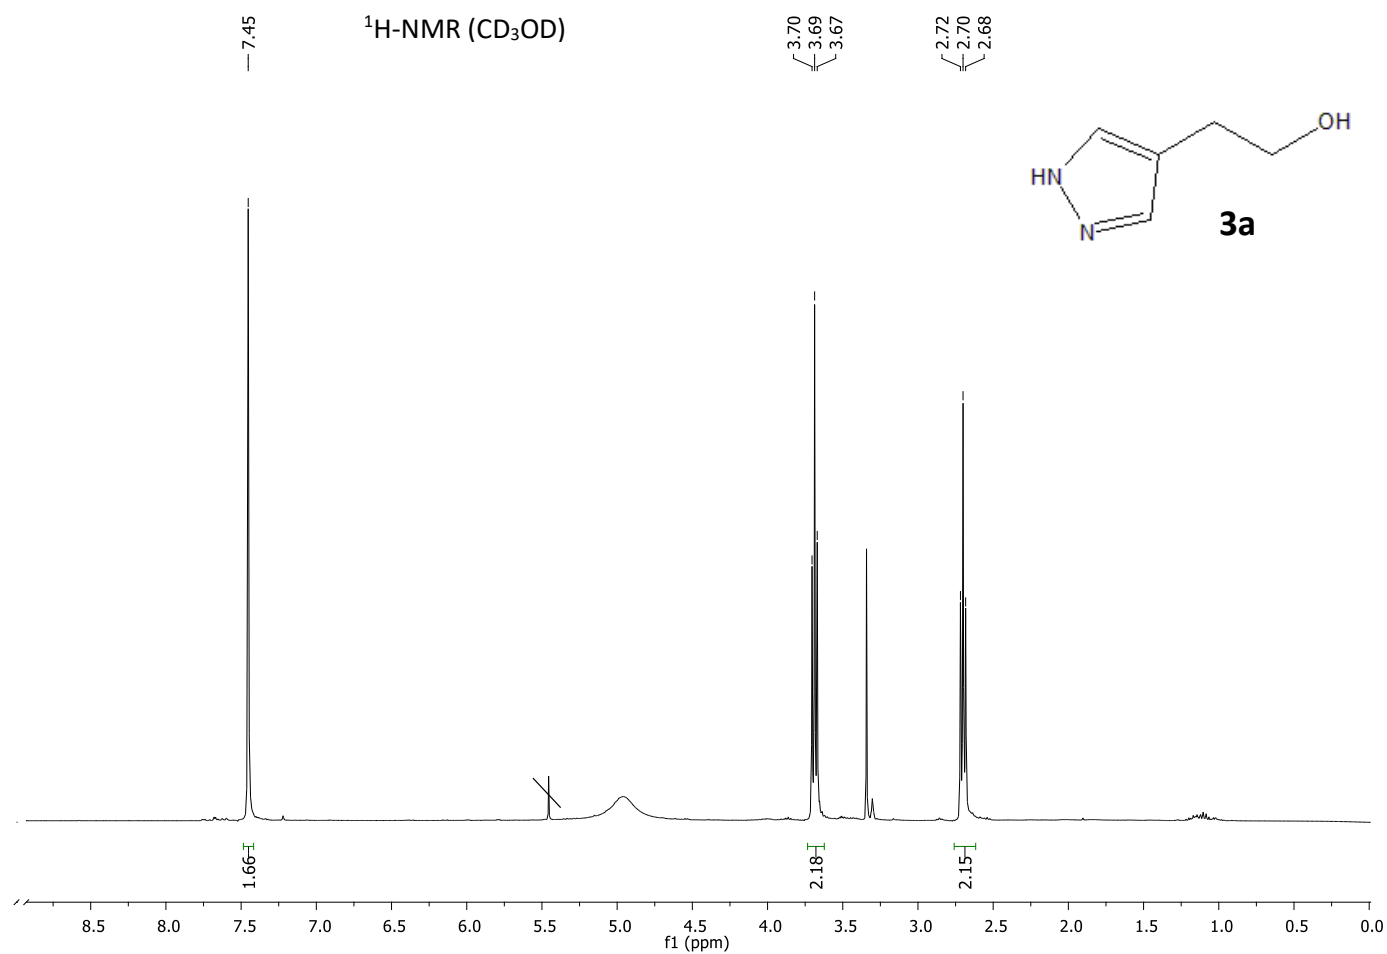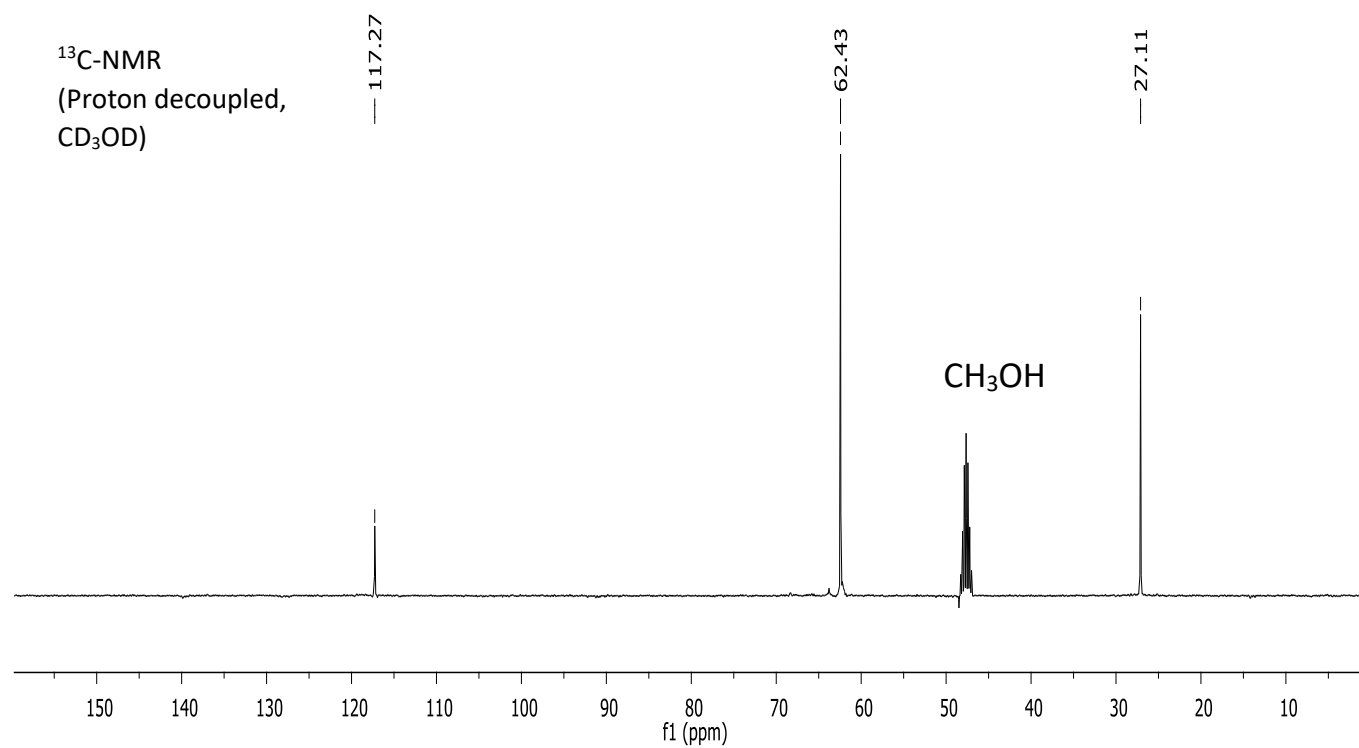

$^1\text{H-NMR}$  ( $\text{CD}_3\text{OD}$ )

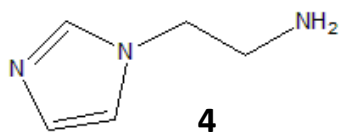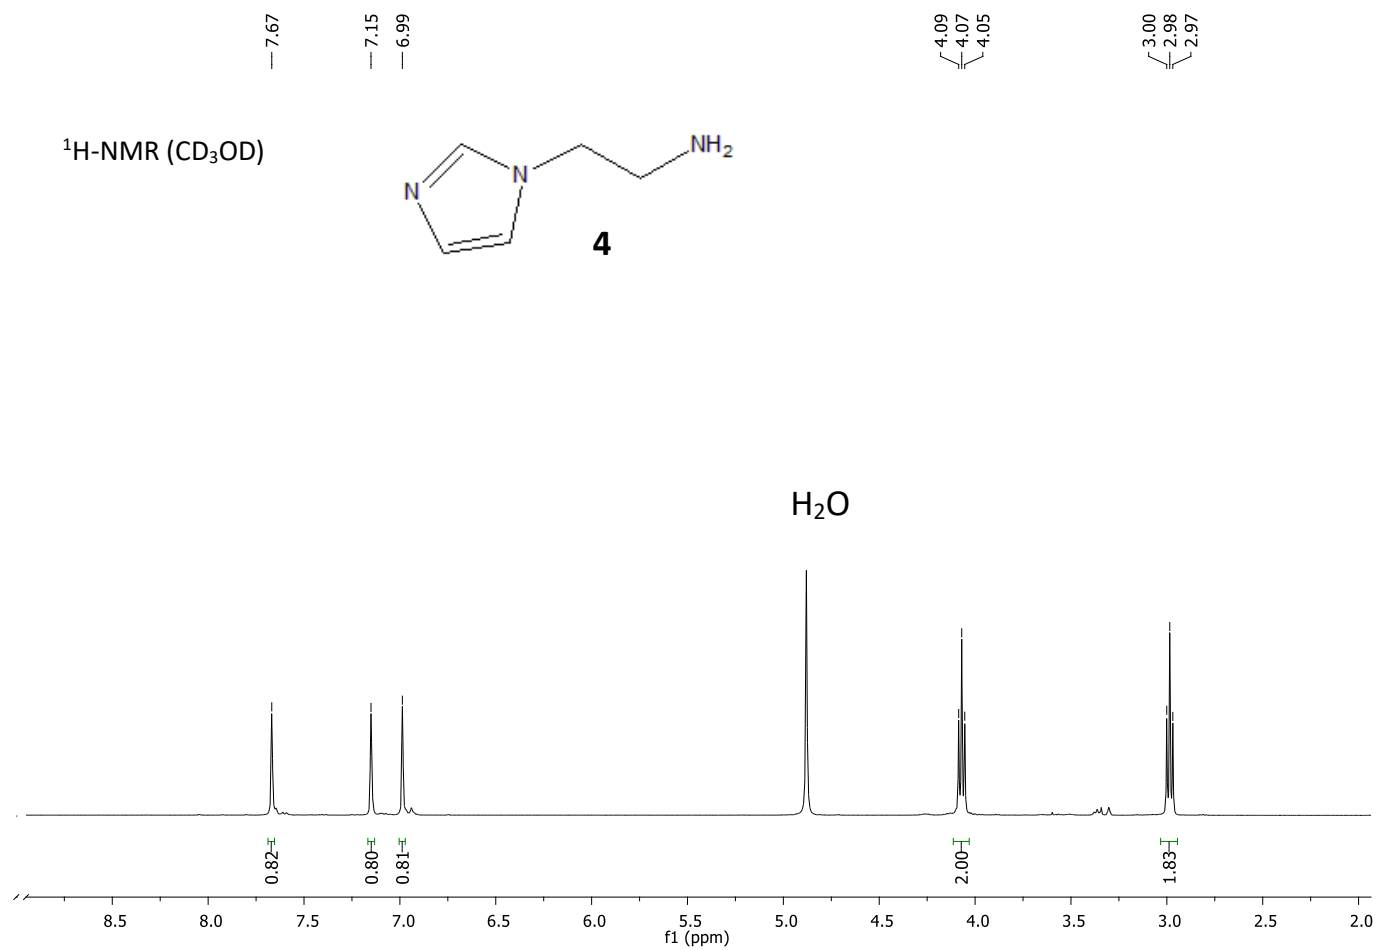

$^{13}\text{C-NMR}$   
(APT,  $\text{CD}_3\text{OD}$ )

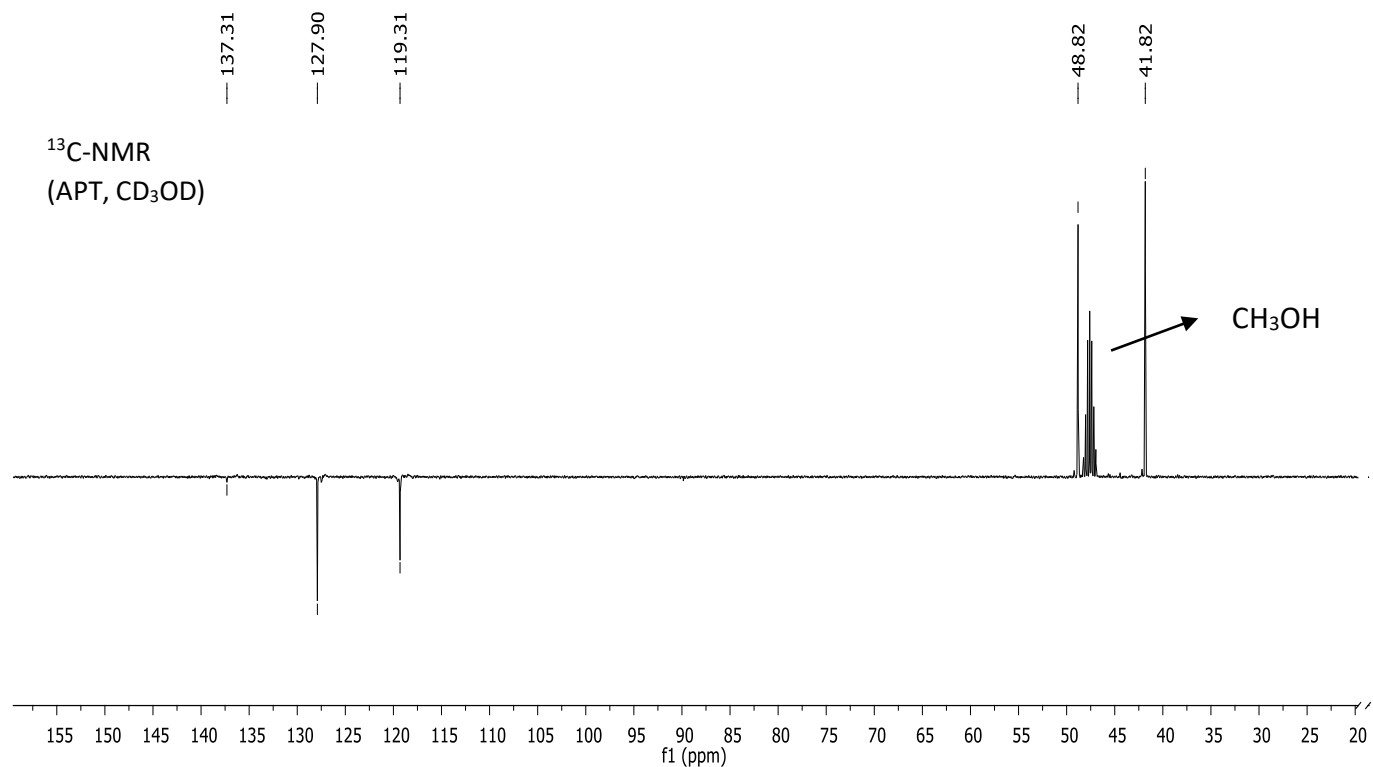

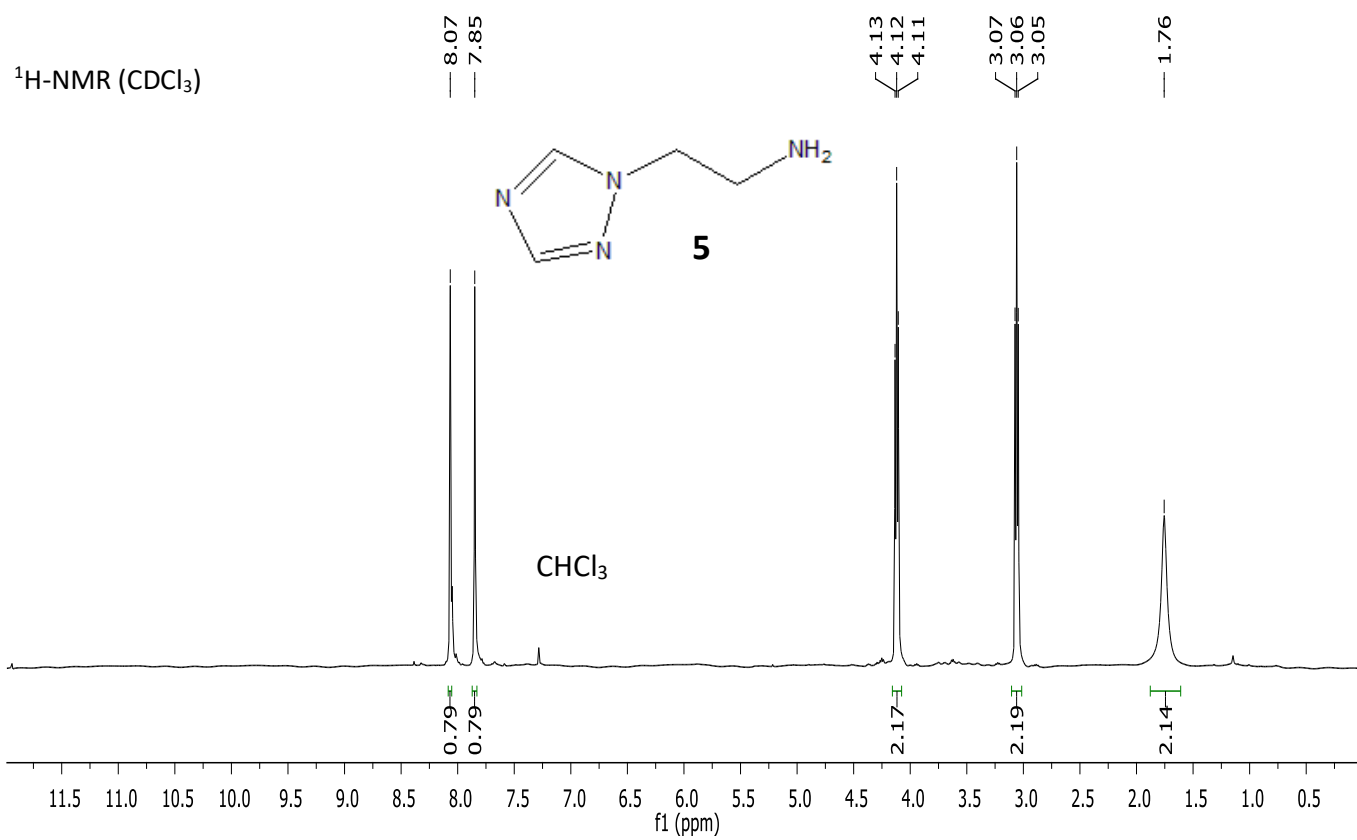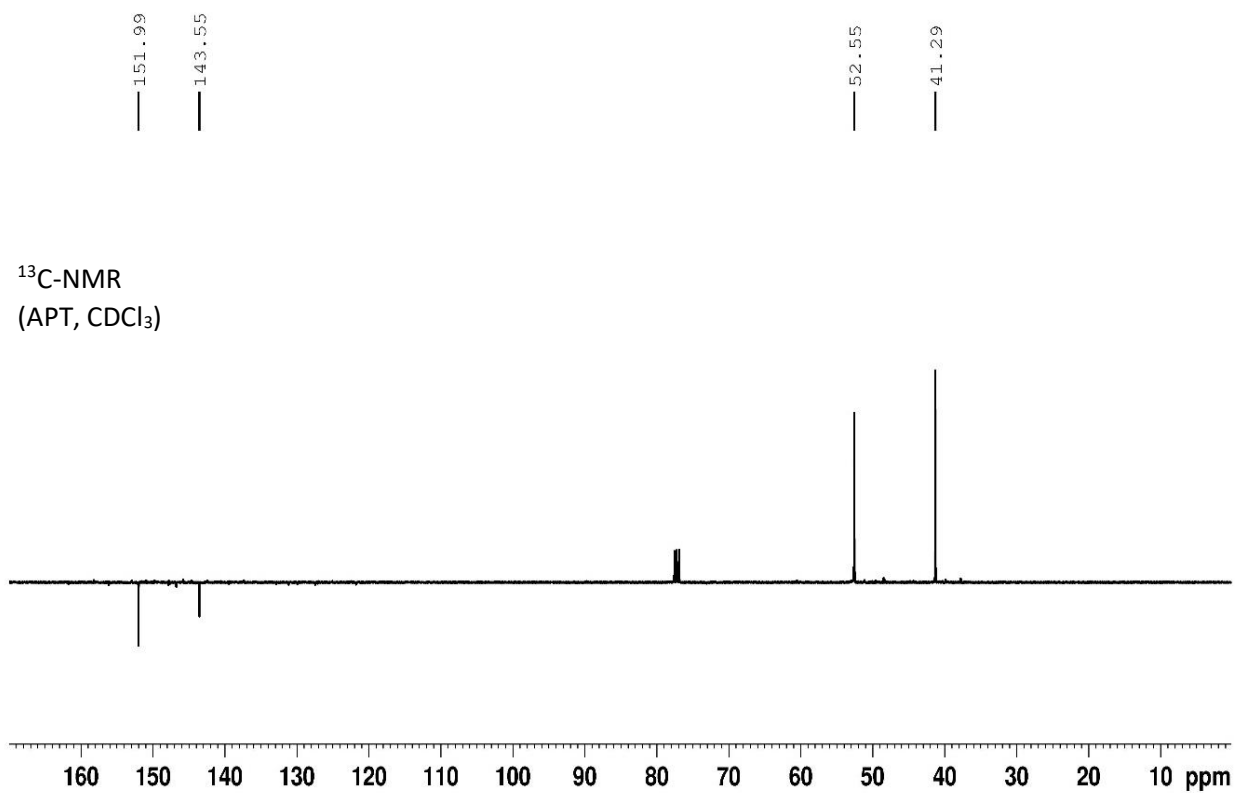

$^1\text{H-NMR}$  ( $\text{D}_2\text{O}$ )

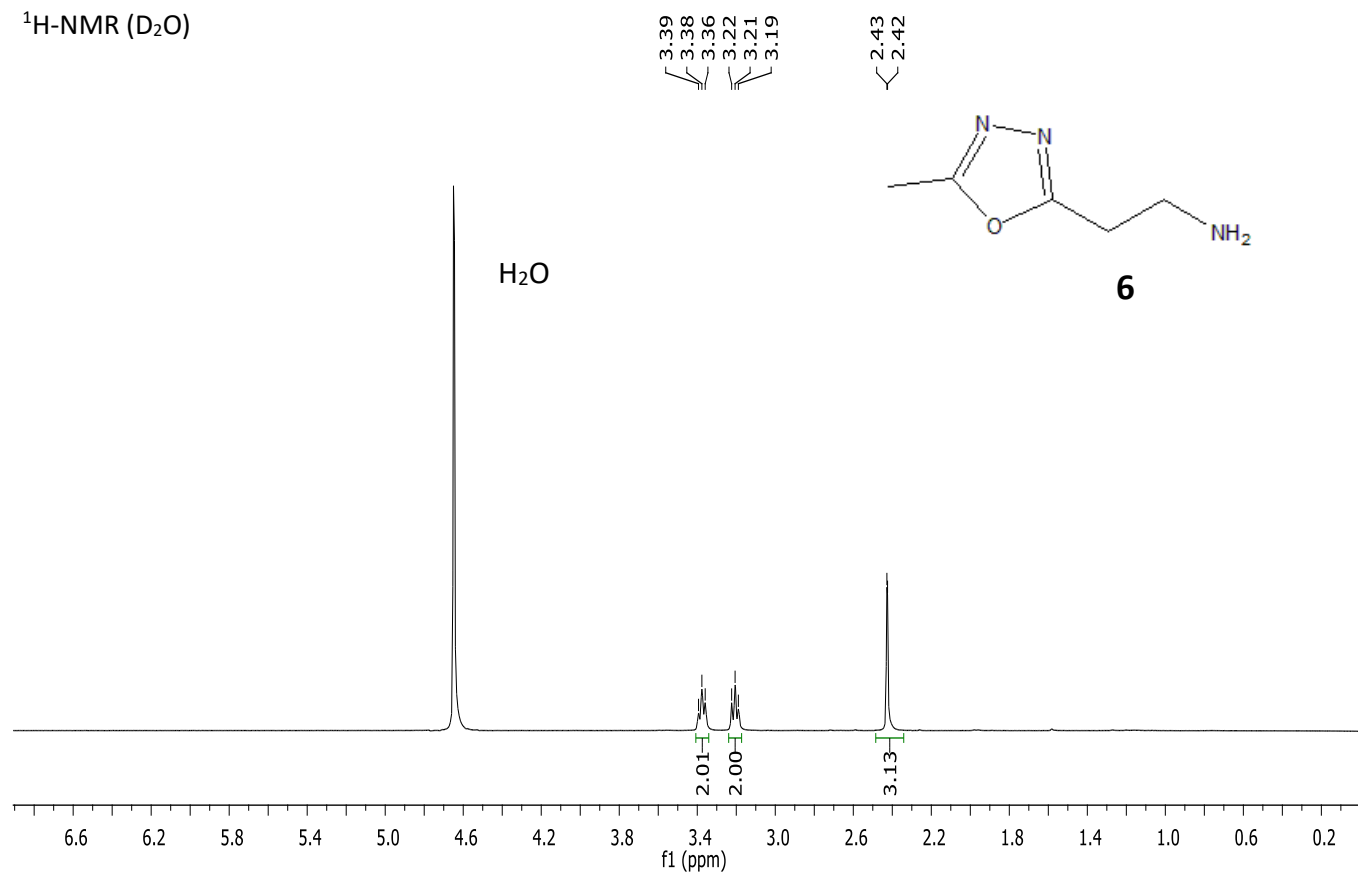

166.23  
164.72  
164.17

**6** (oxalate salt)  
 $^{13}\text{C-NMR}$   
(Proton decoupled,  $\text{D}_2\text{O}$ )

35.92  
23.02  
9.96

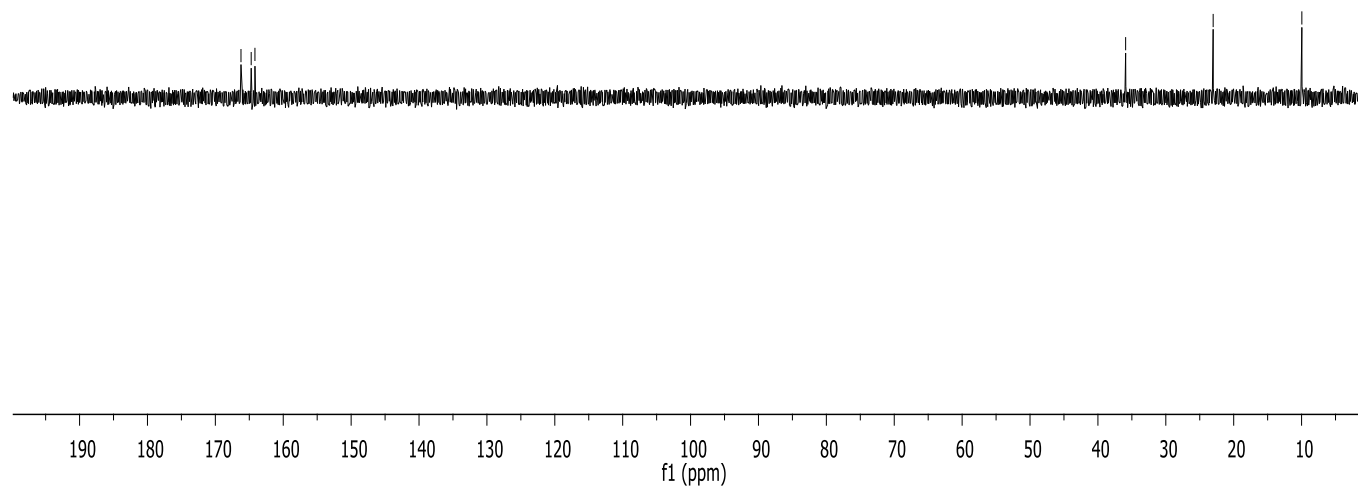

$^1\text{H}$ -NMR ( $\text{CDCl}_3$ )

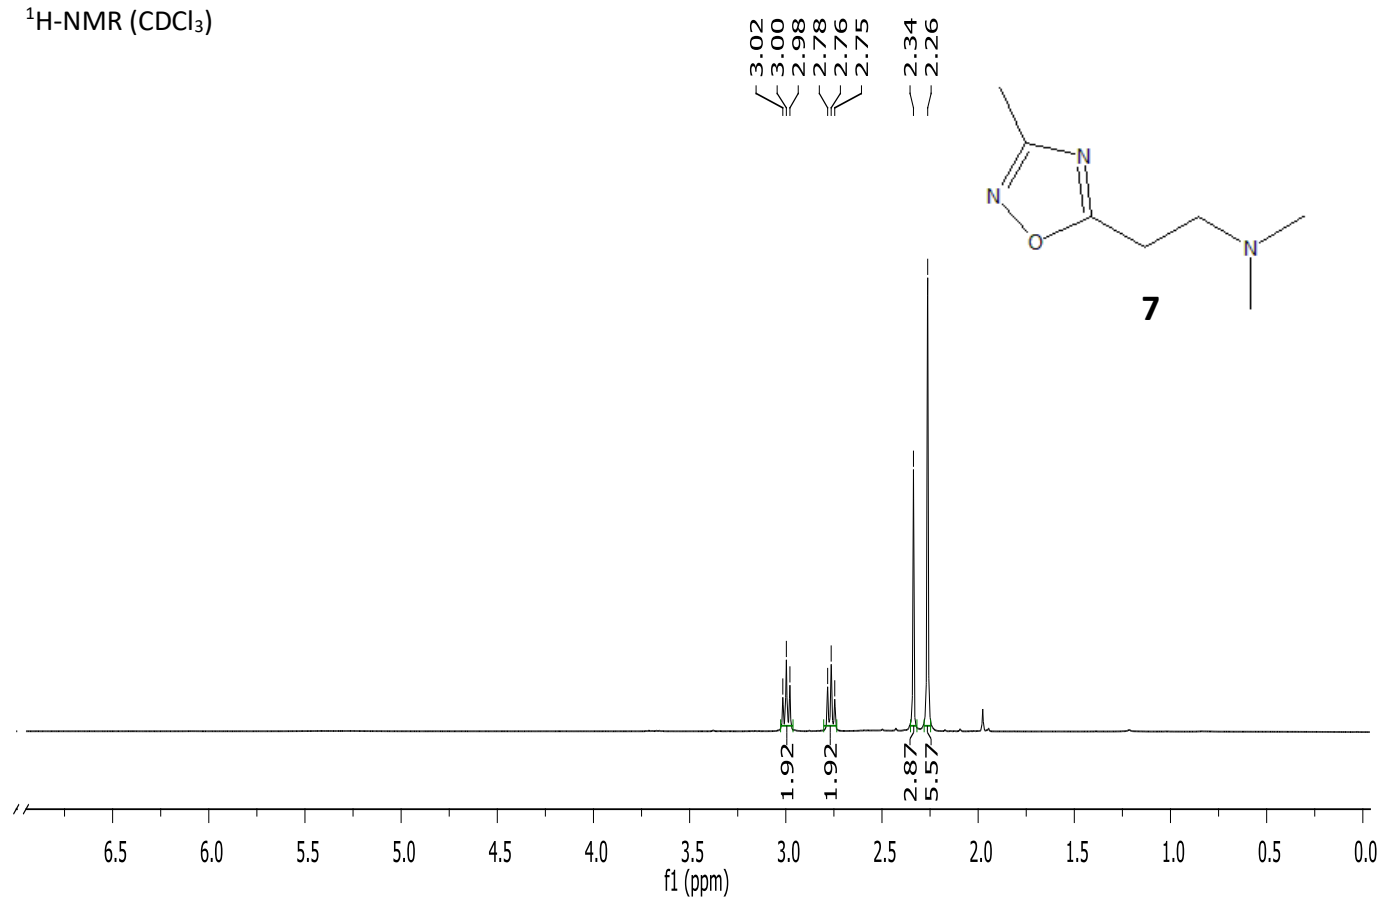

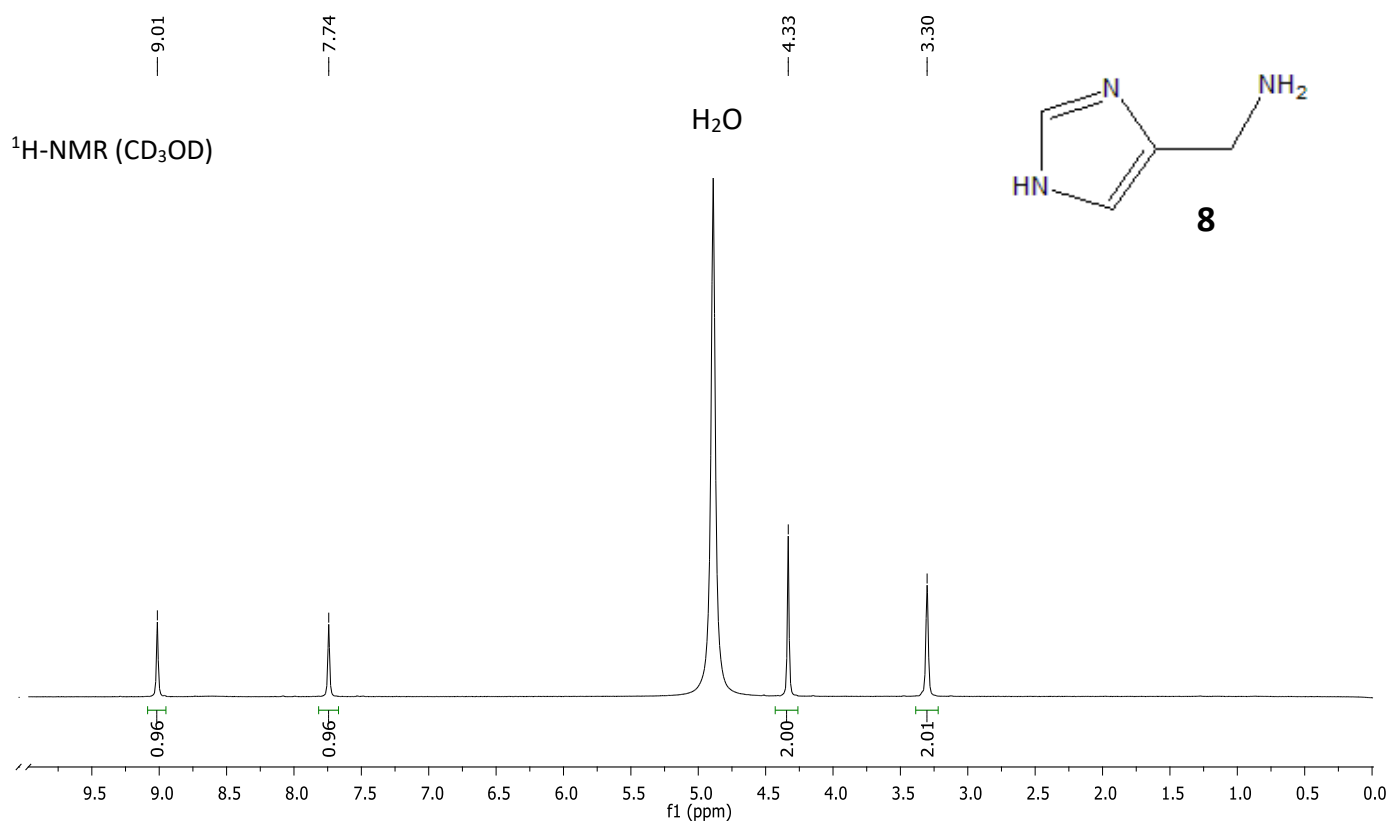

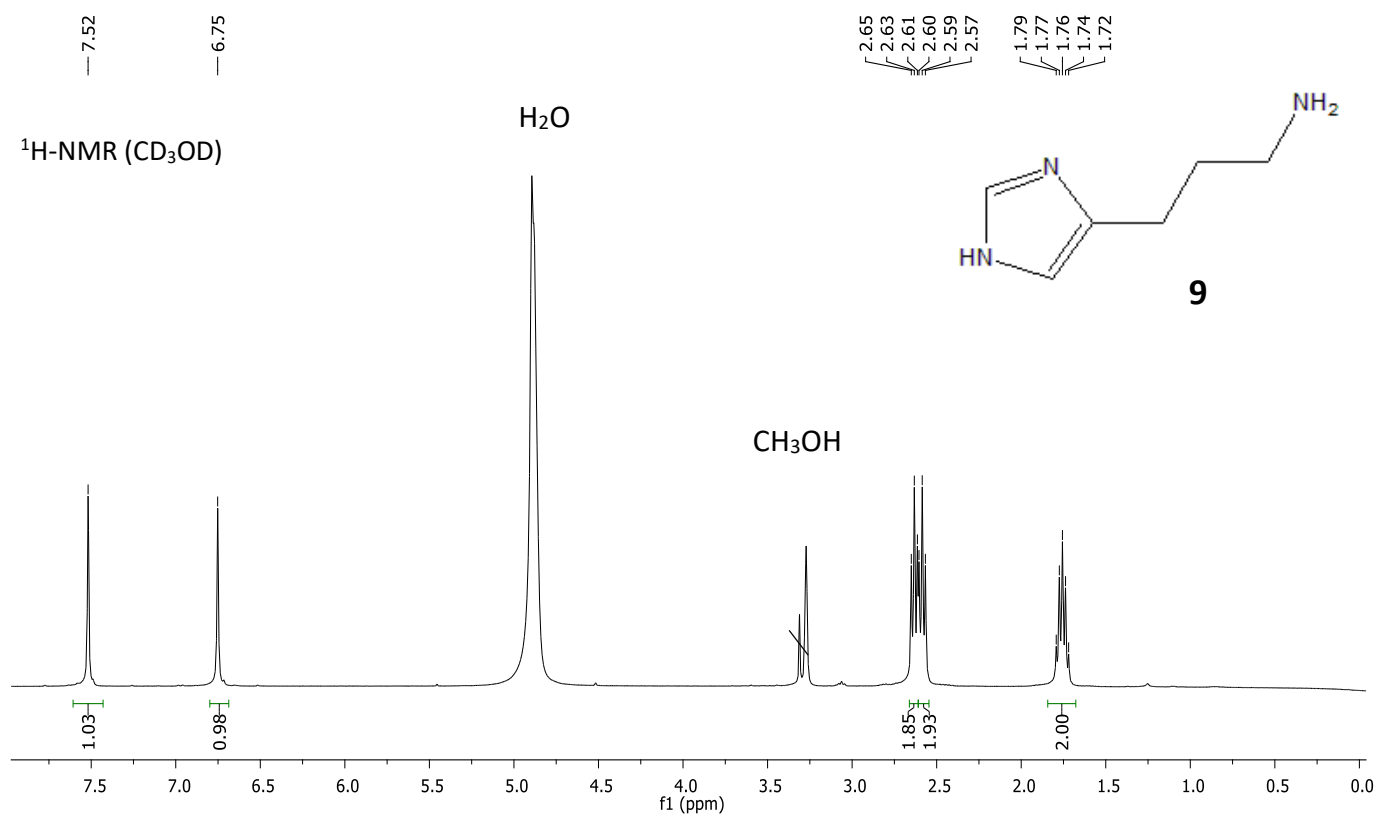

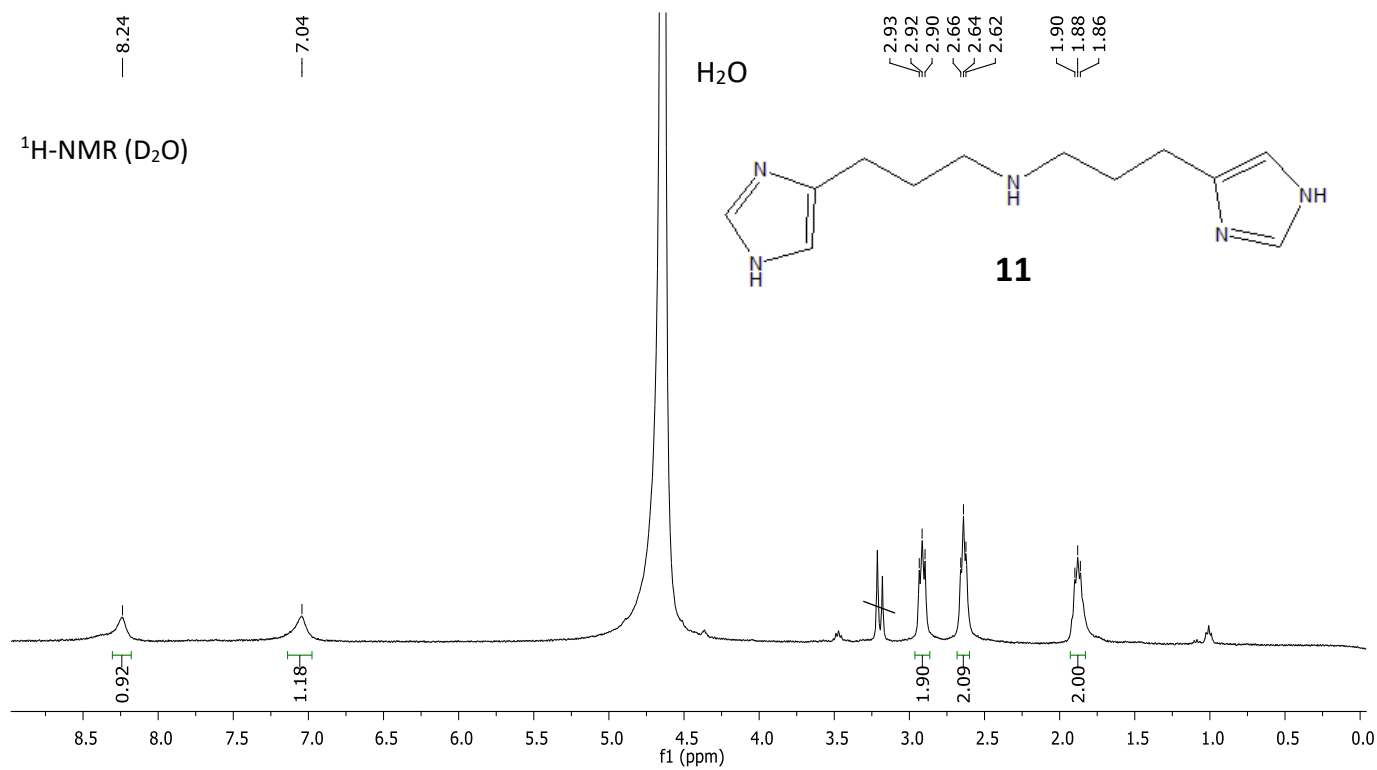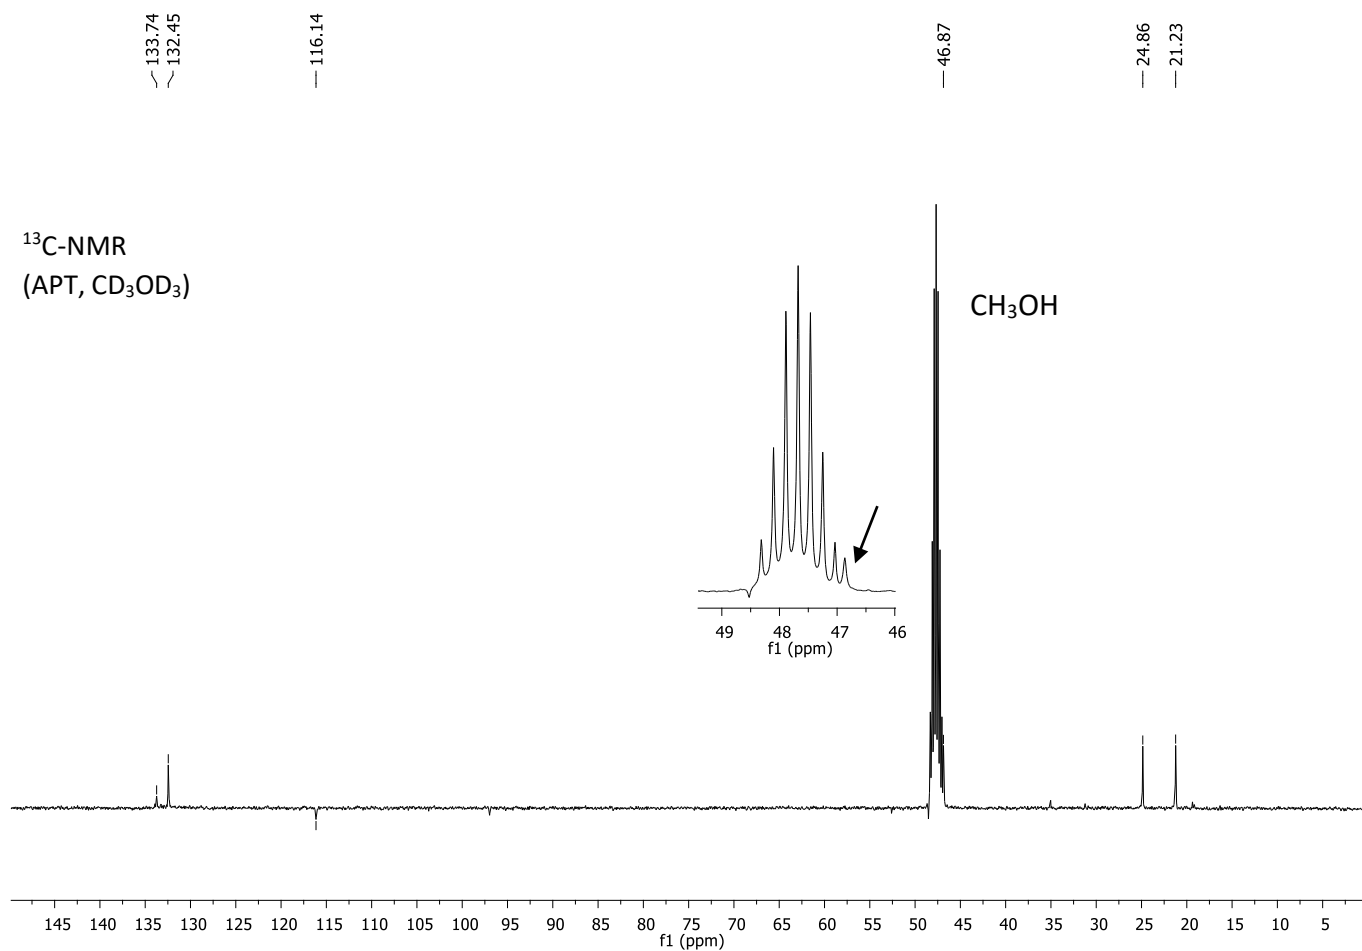

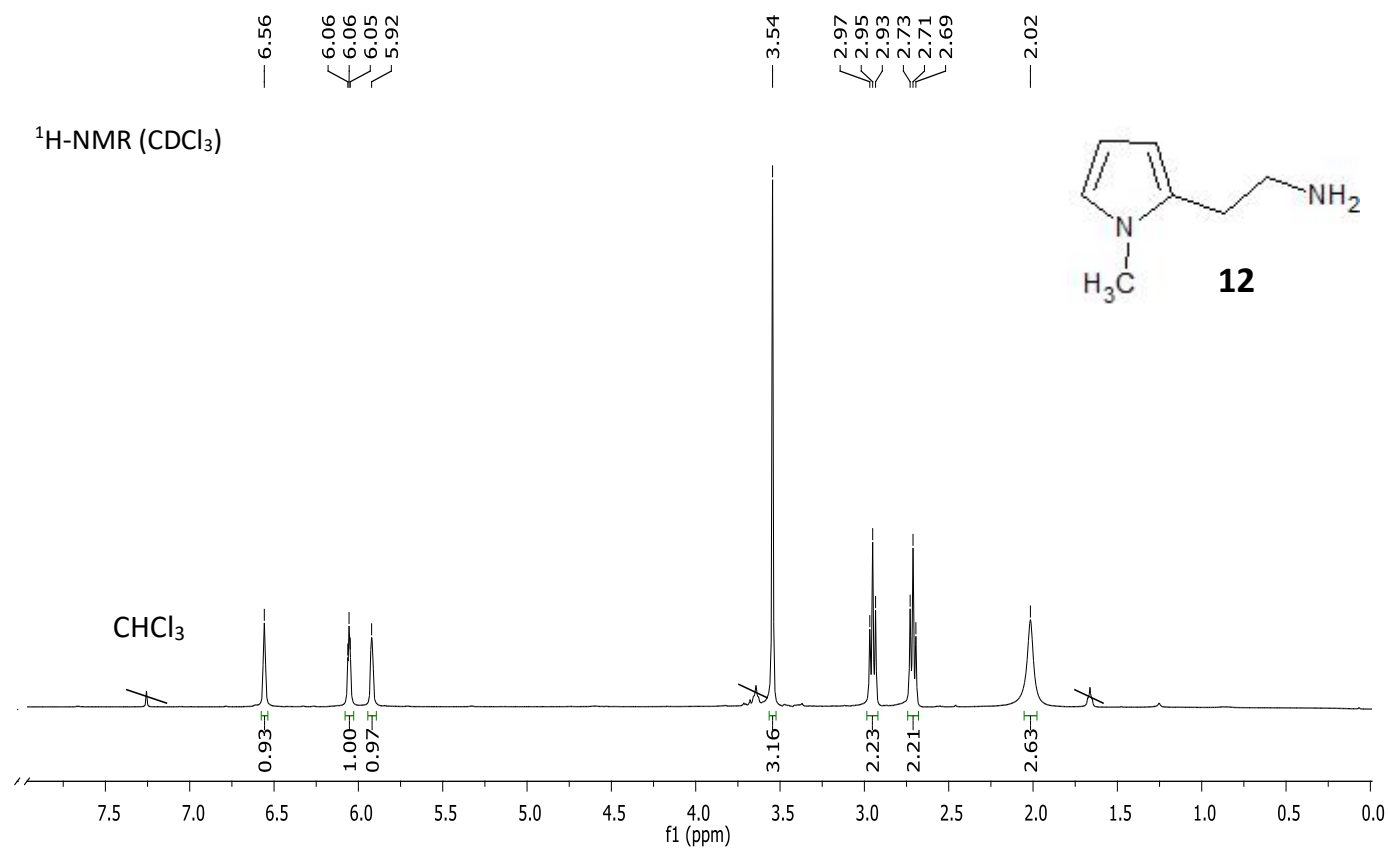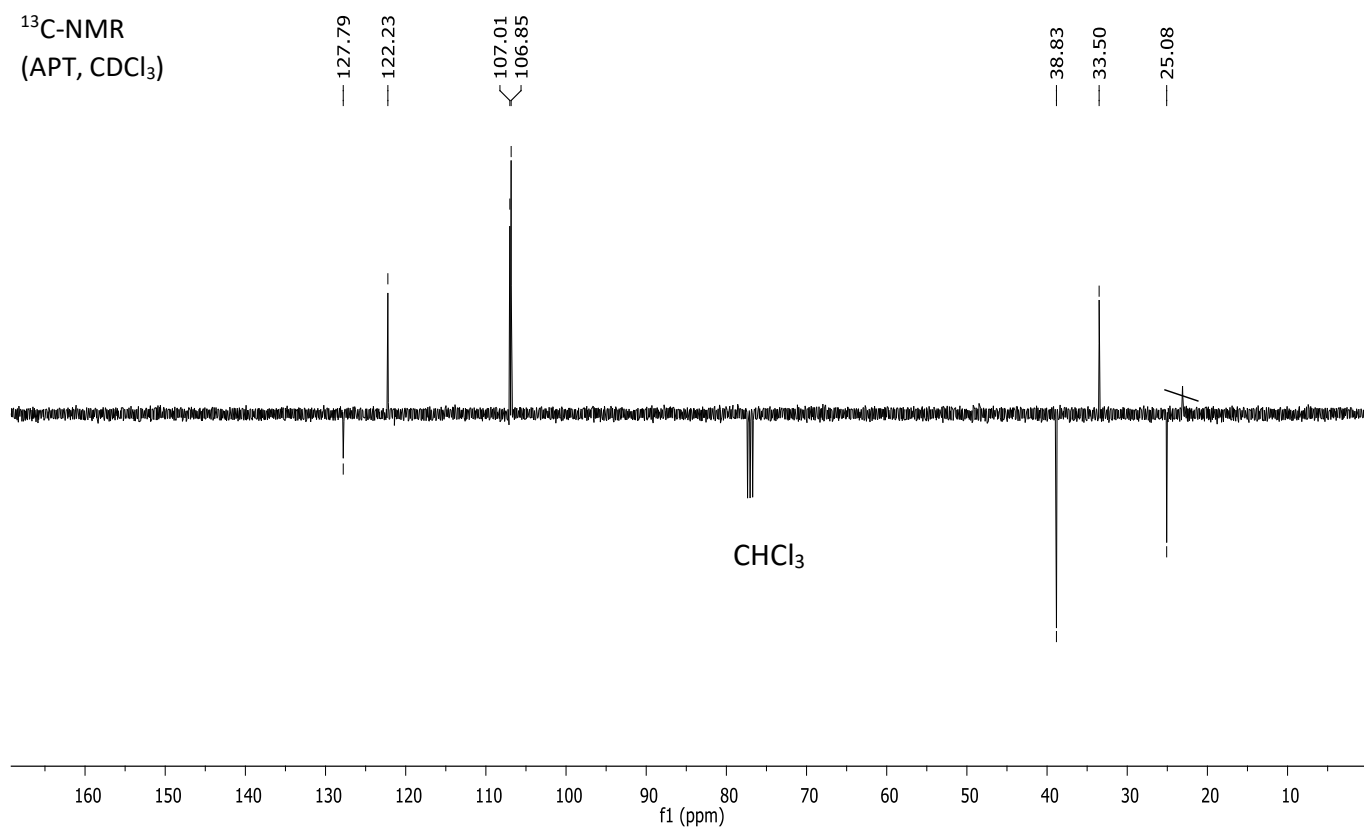

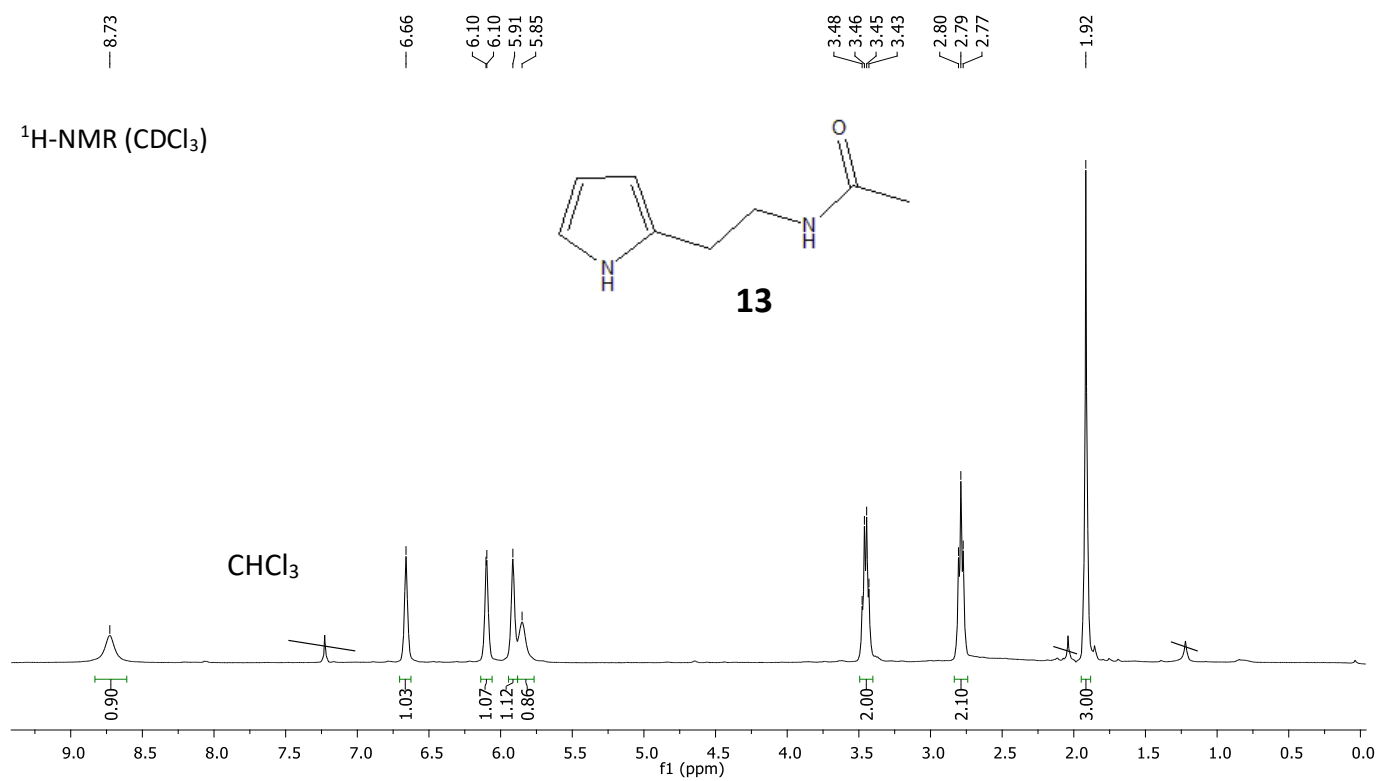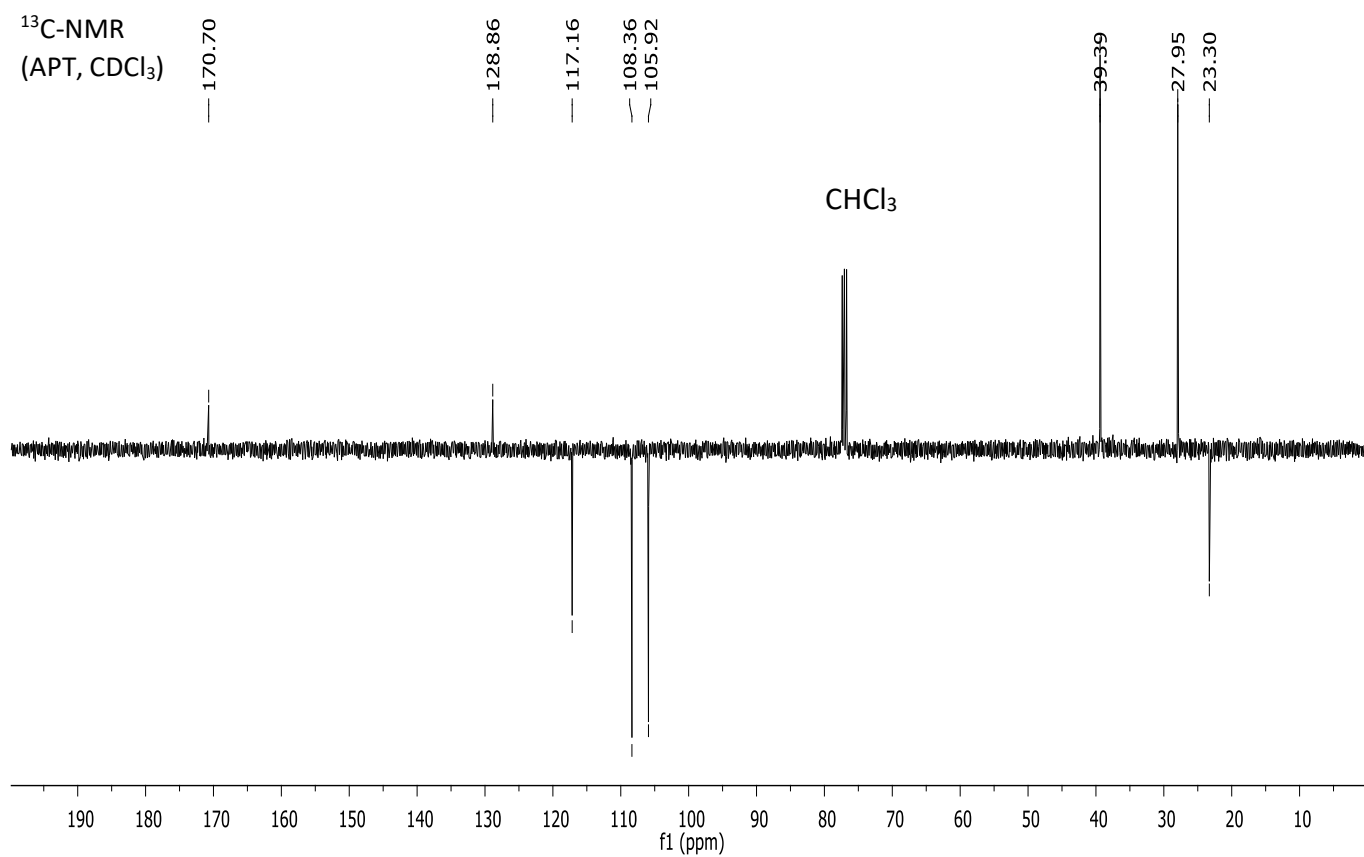

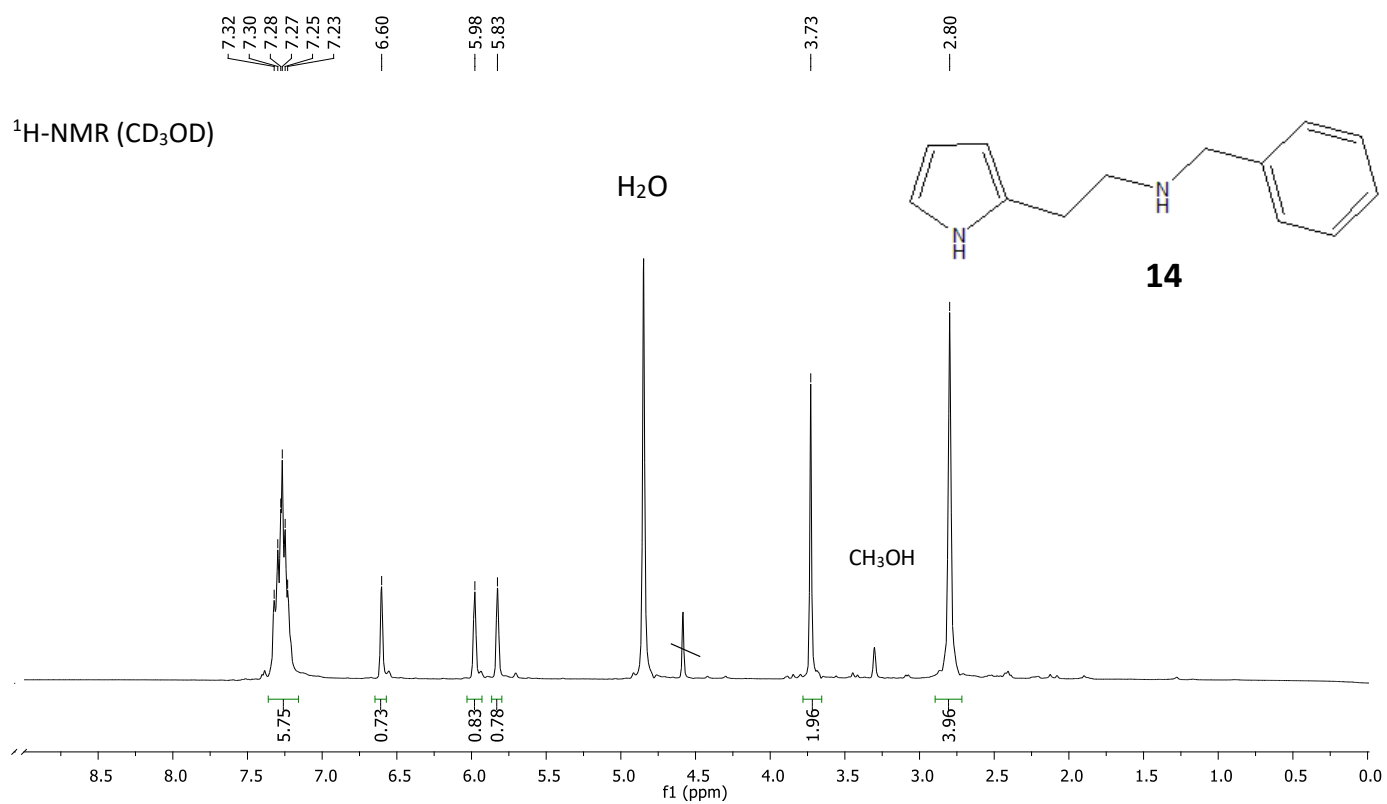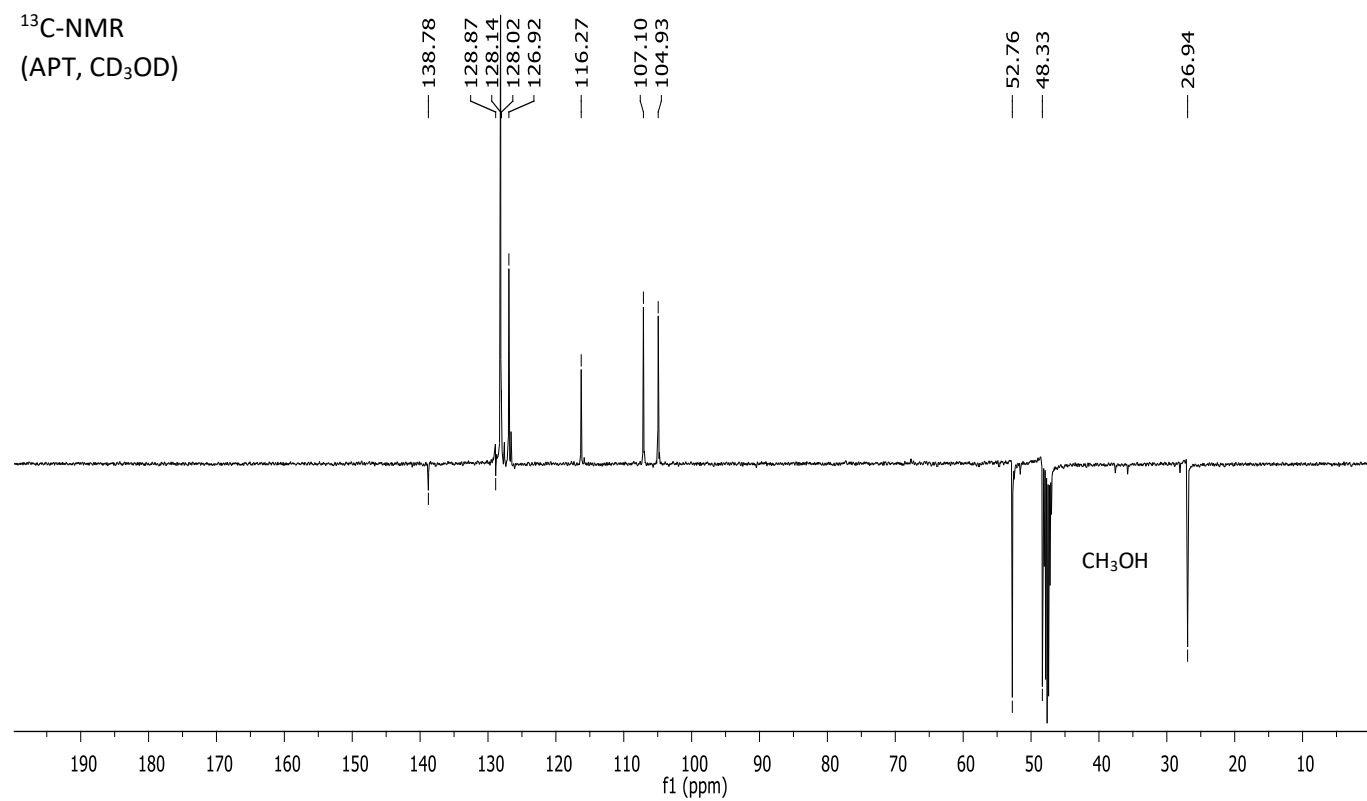

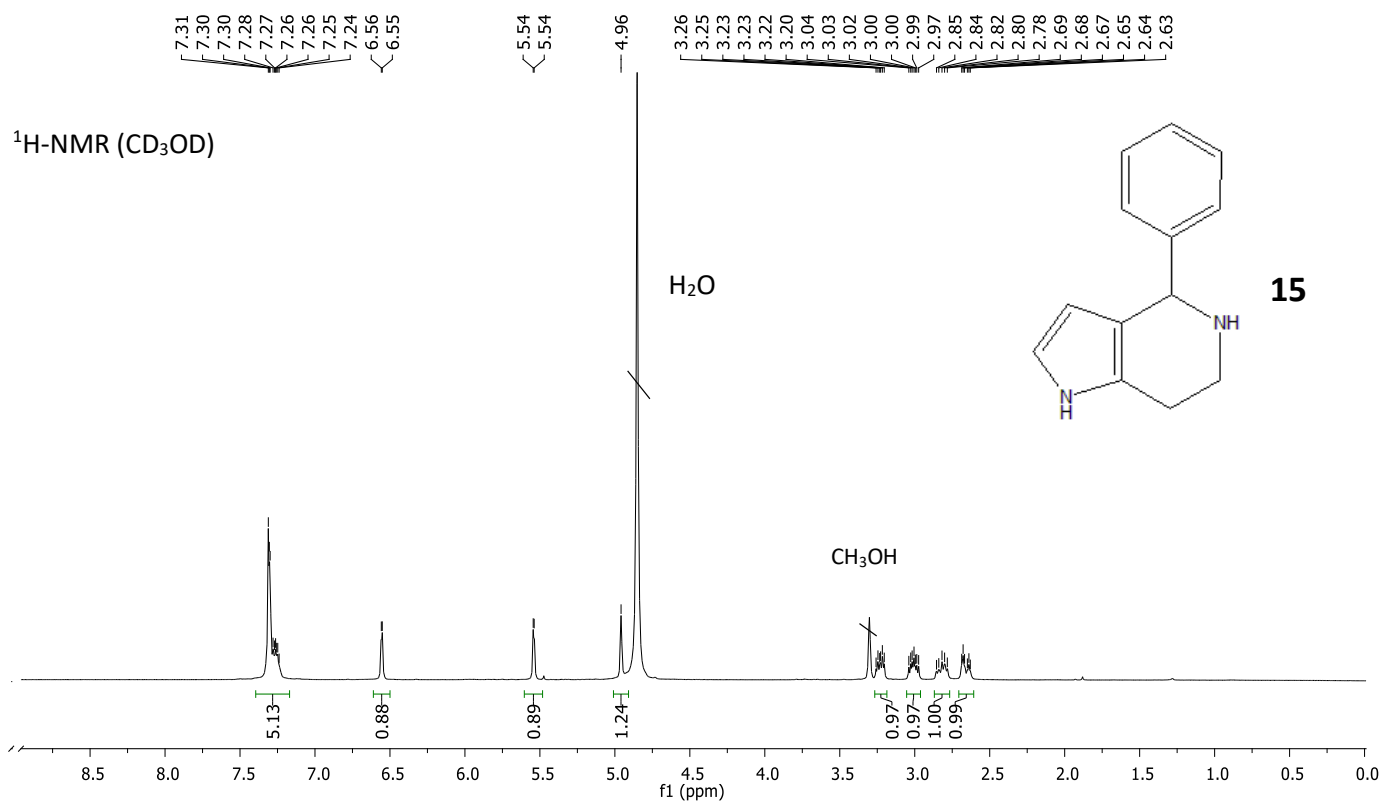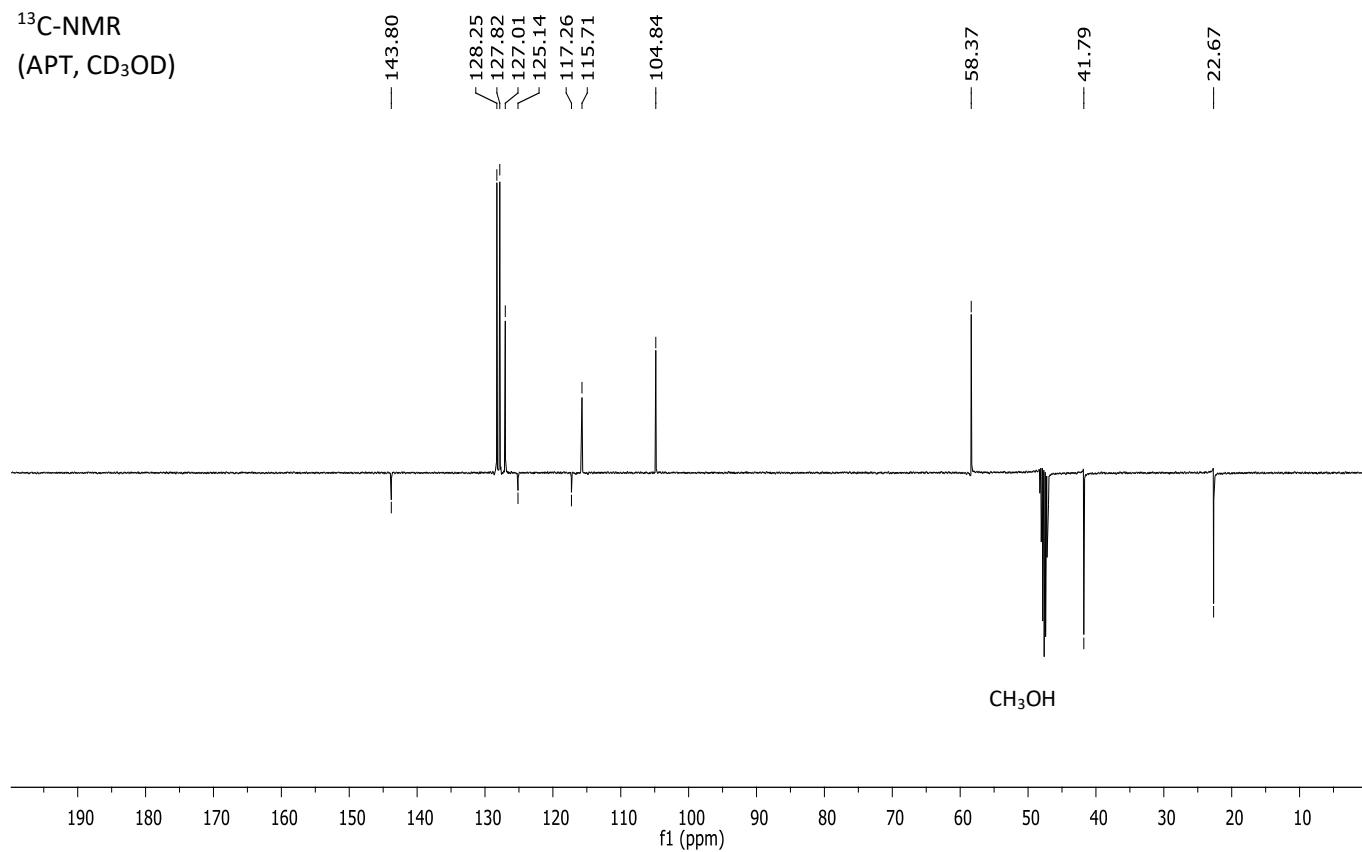

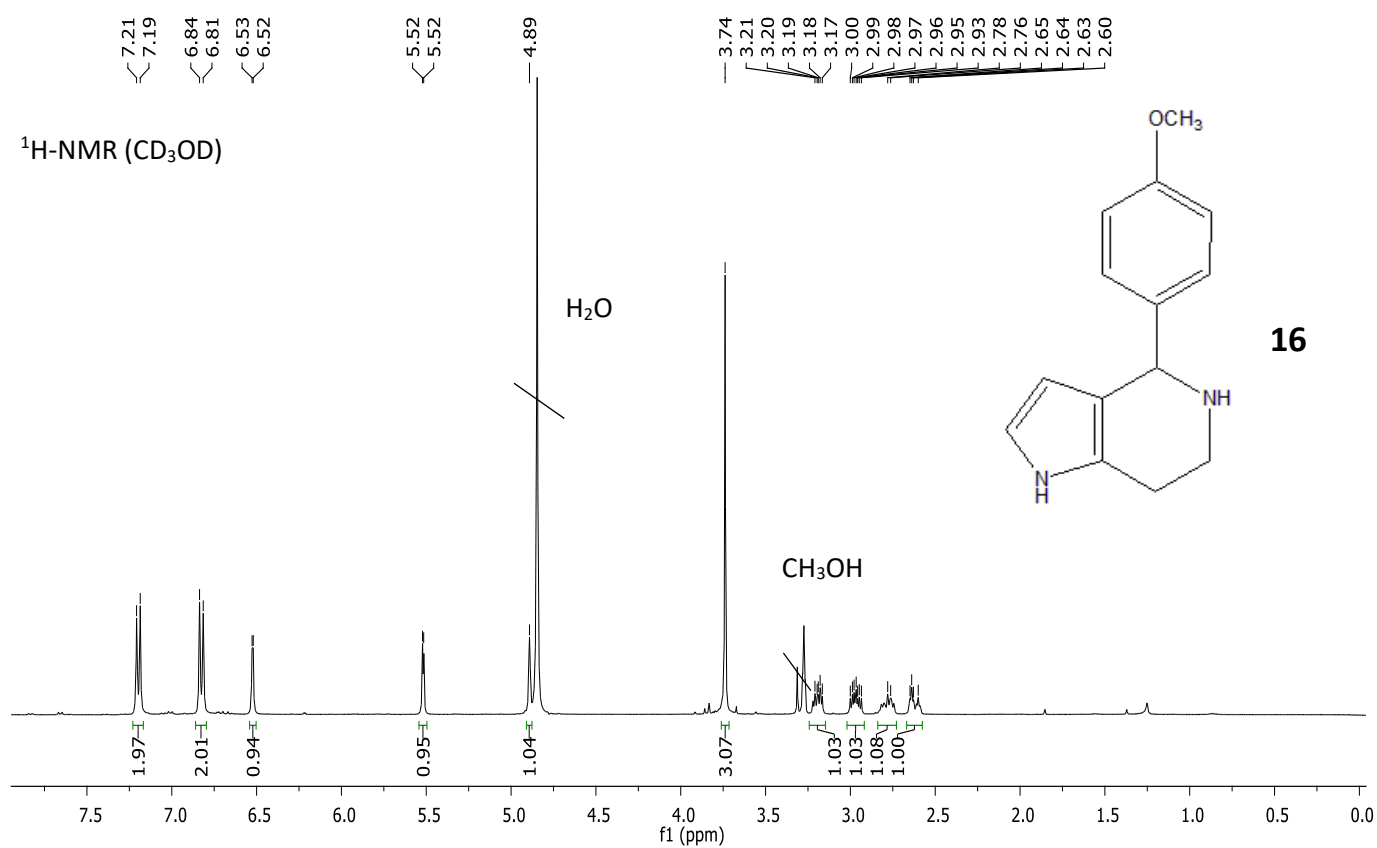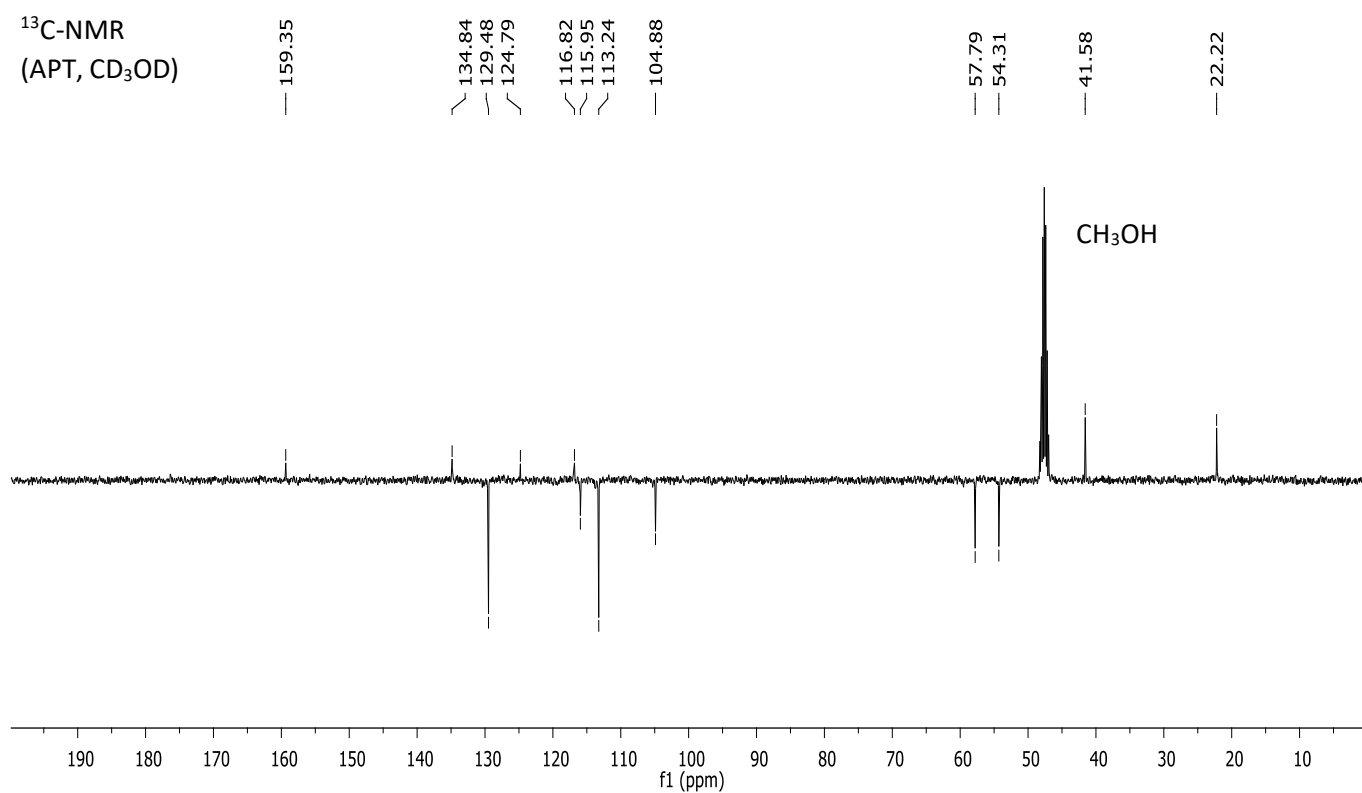

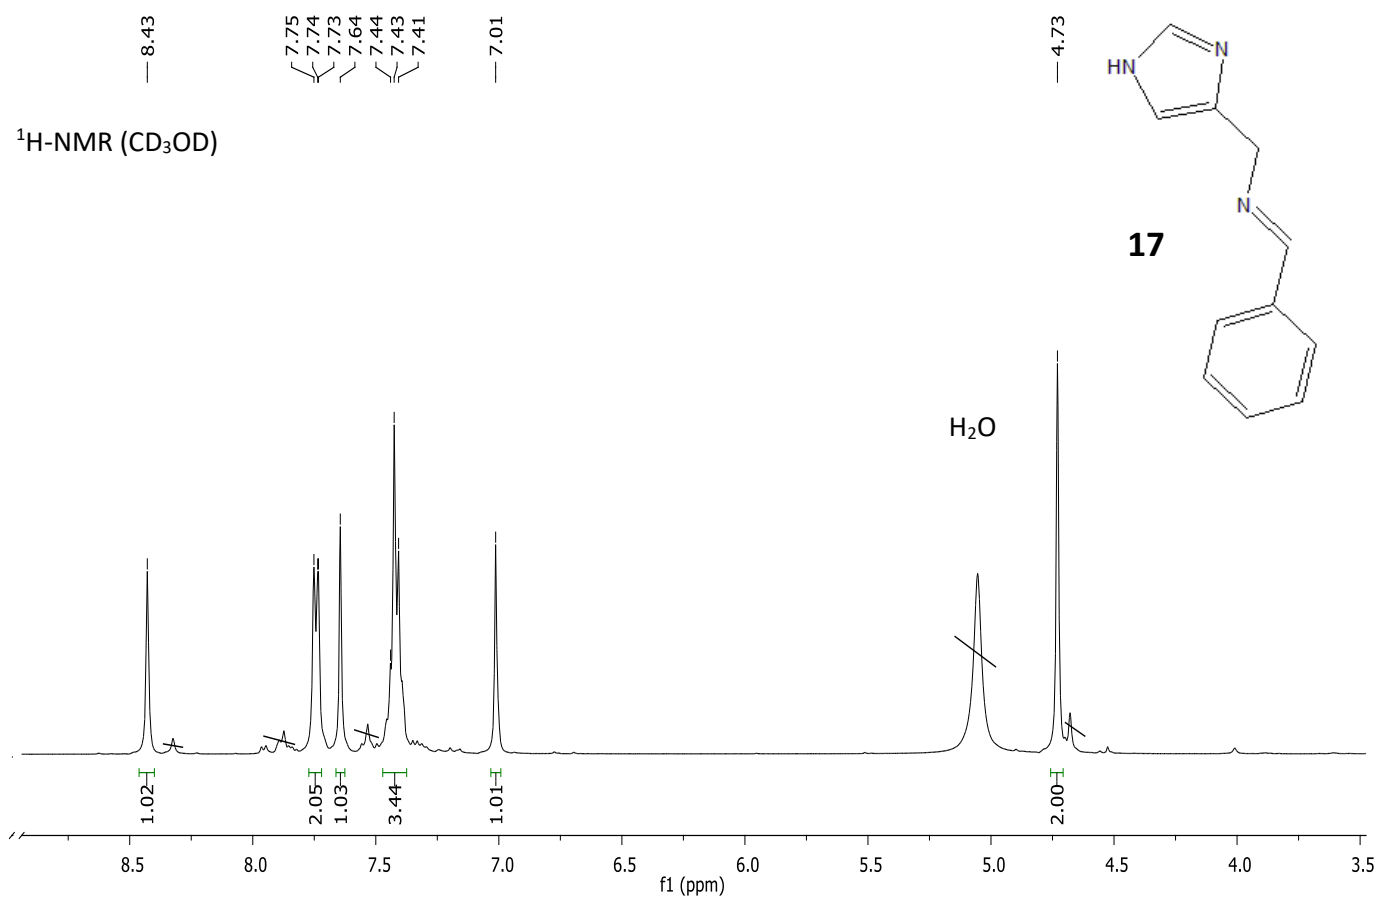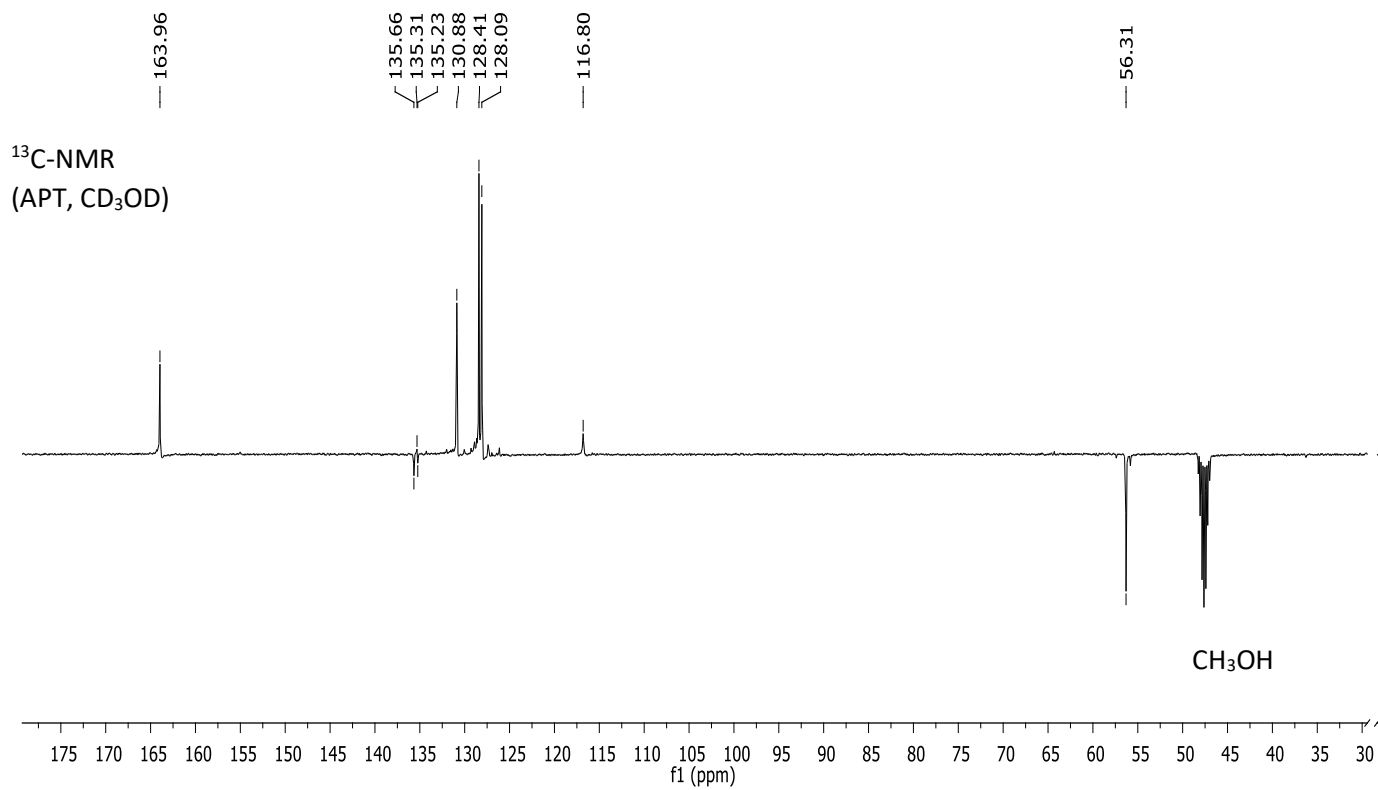

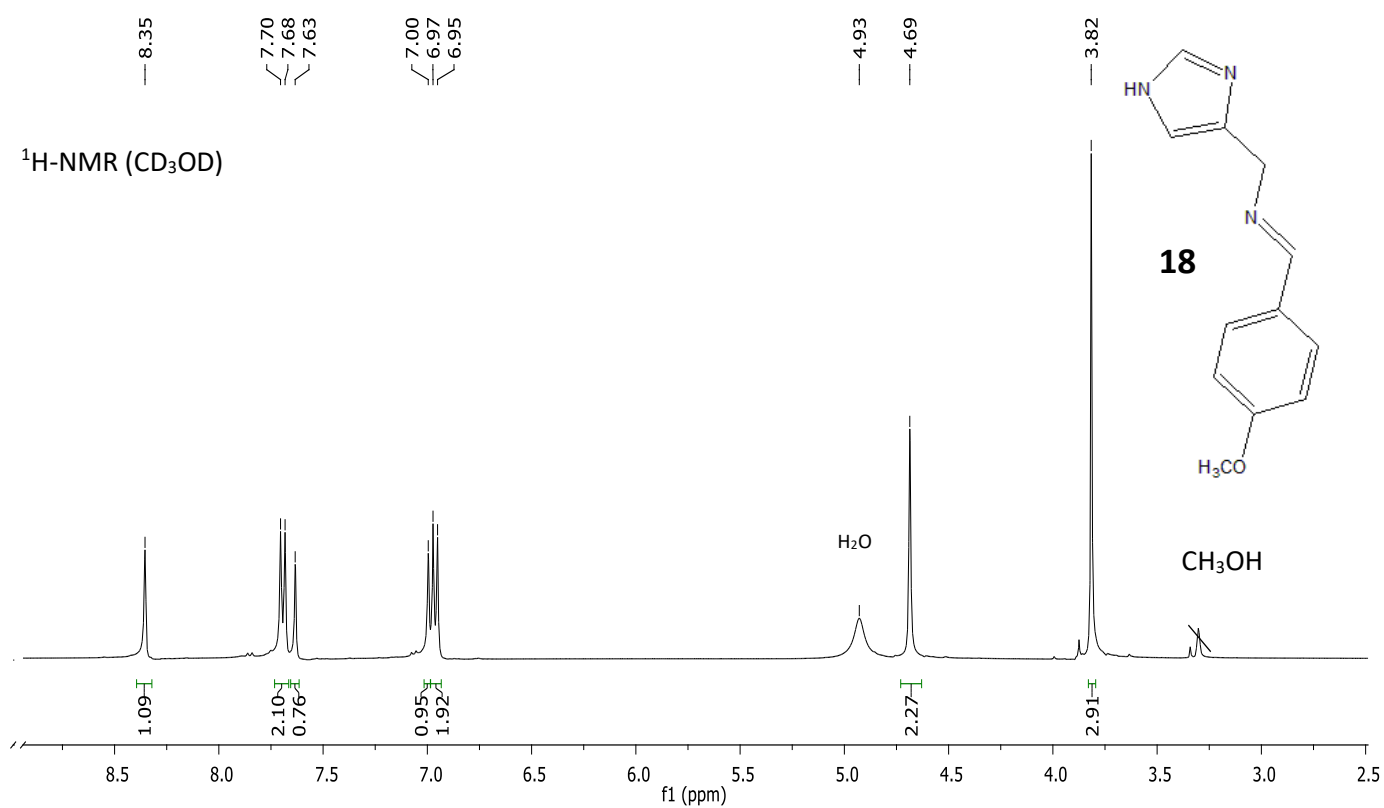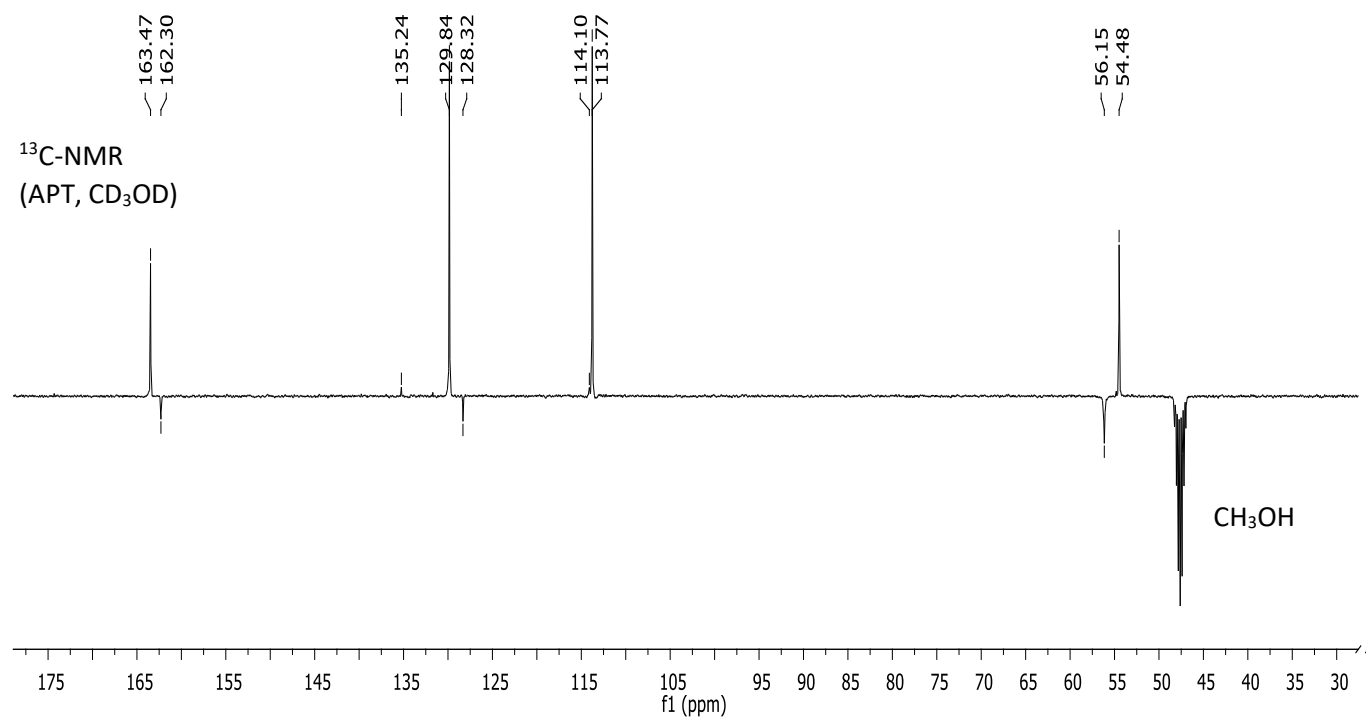

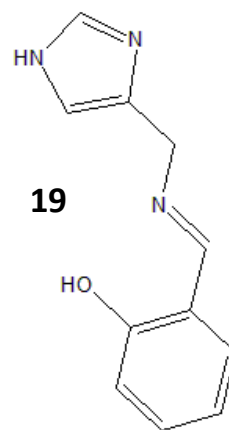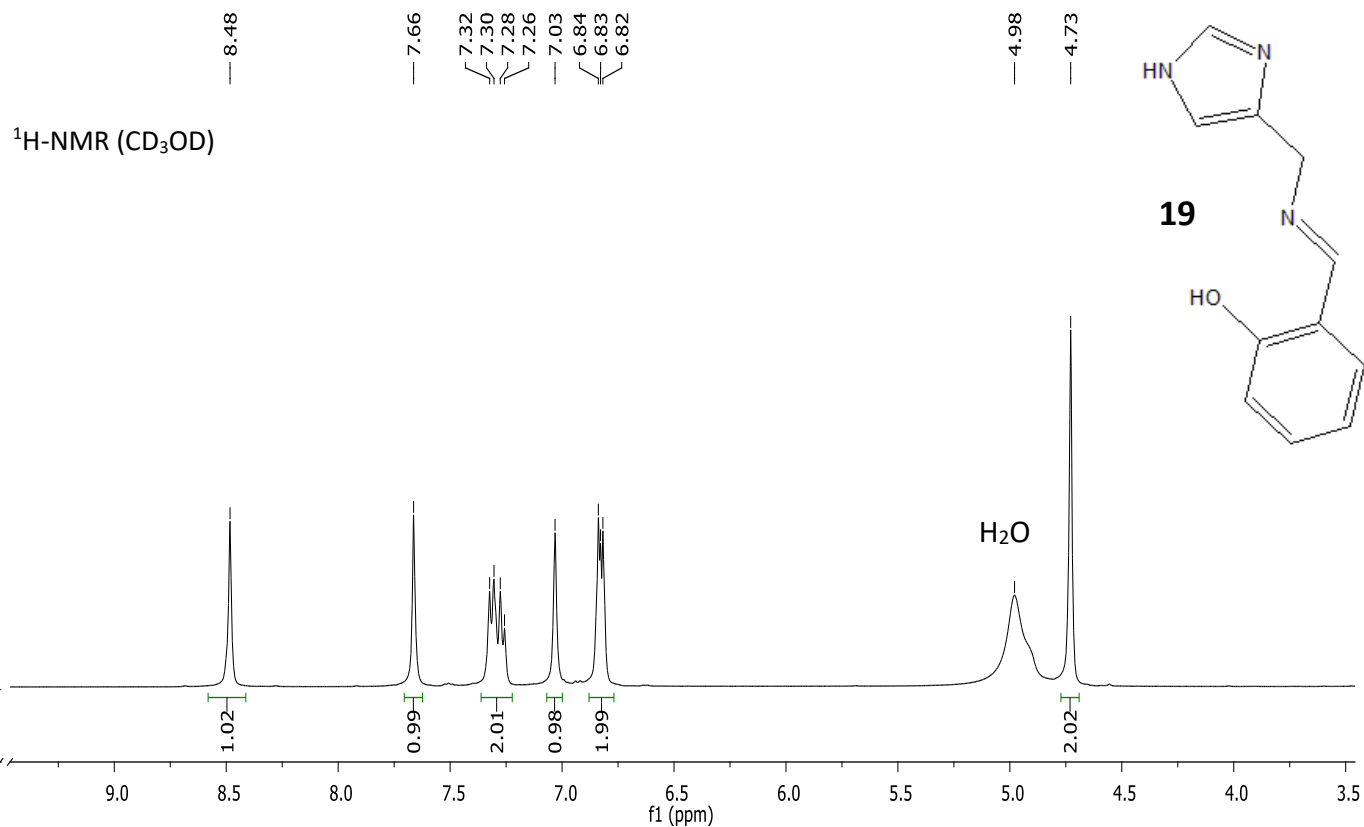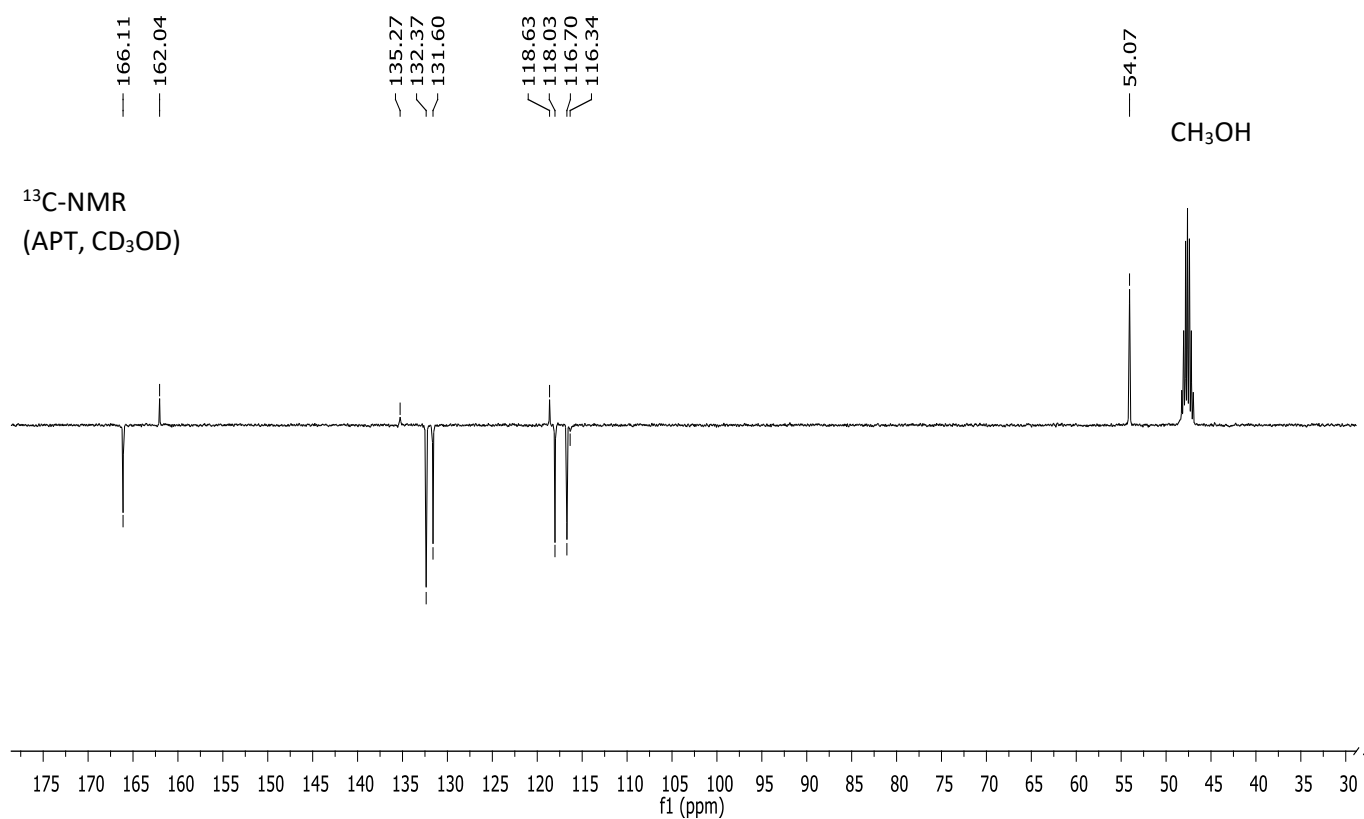

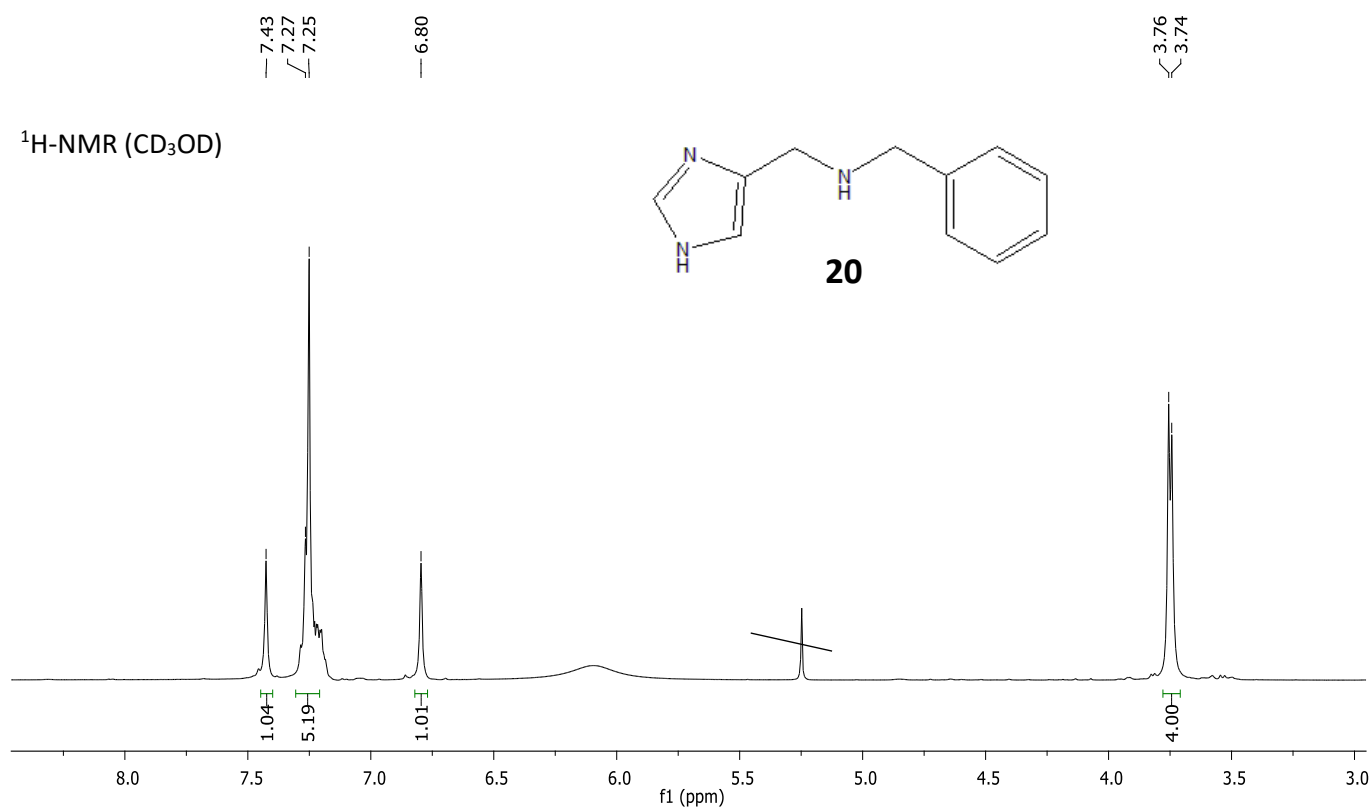

$^1\text{H-NMR}$  ( $\text{CD}_3\text{OD}$ )

7.60  
7.21  
7.19  
6.96  
6.85  
6.83

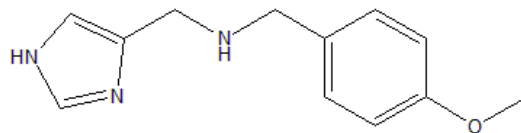

**21**

3.73  
3.68  
3.65

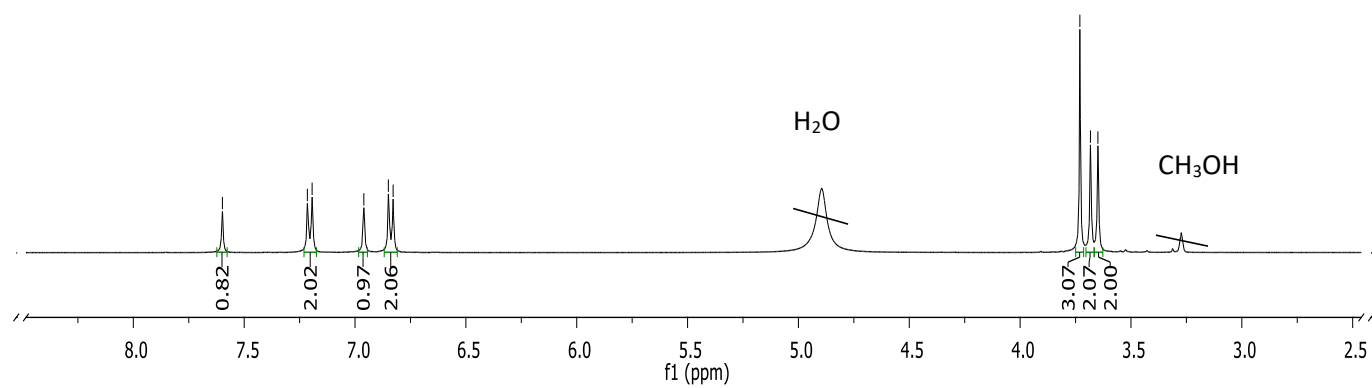

$^{13}\text{C-NMR}$   
(APT,  $\text{CD}_3\text{OD}$ )

159.06  
135.03  
130.81  
129.51  
113.49  
113.29  
54.28  
51.58  
44.05

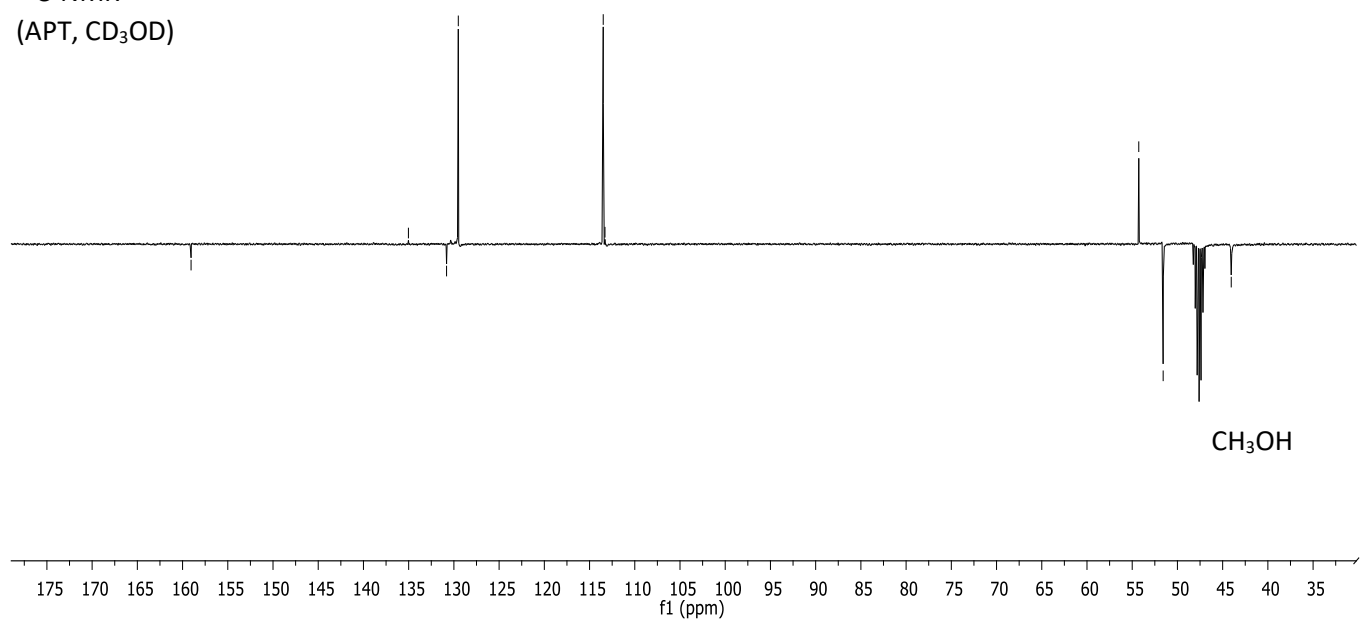

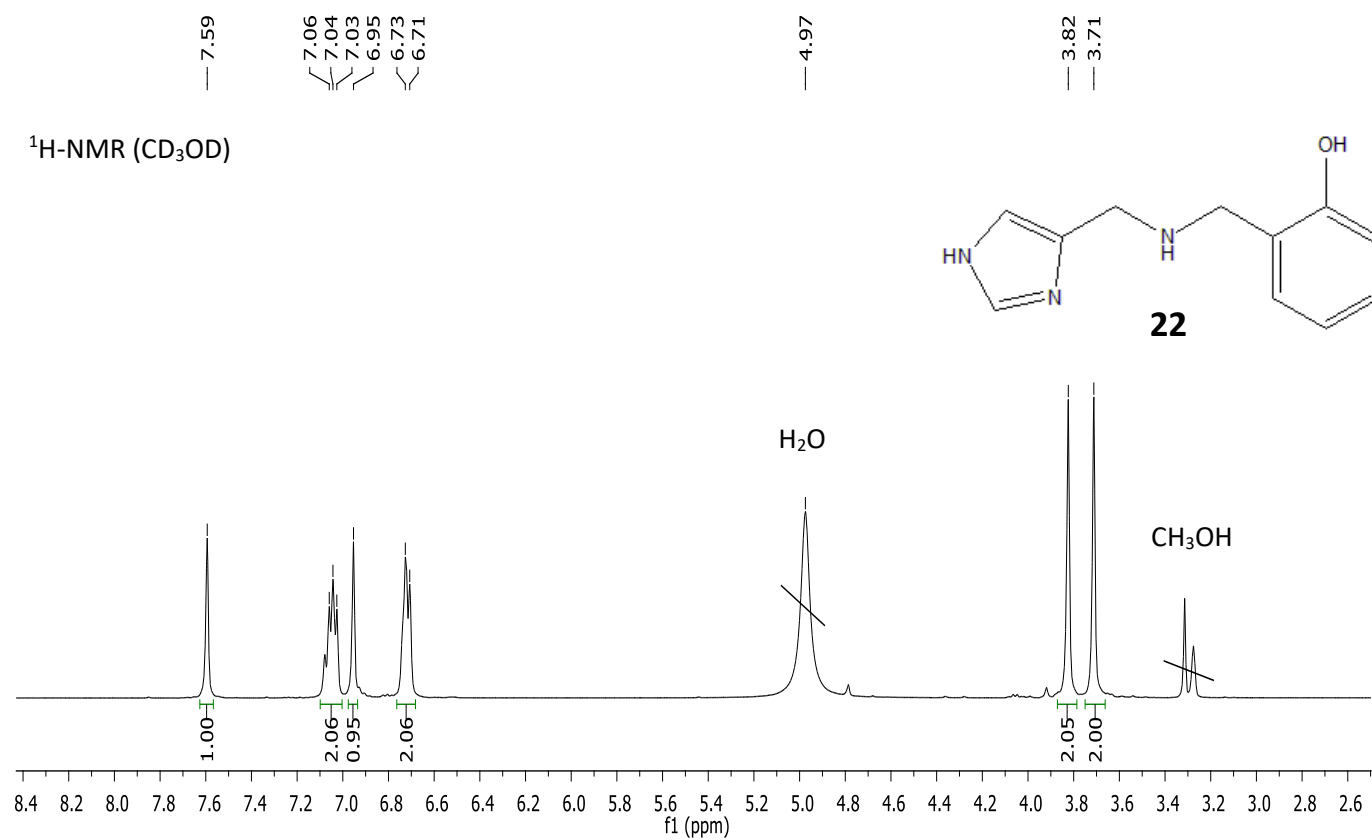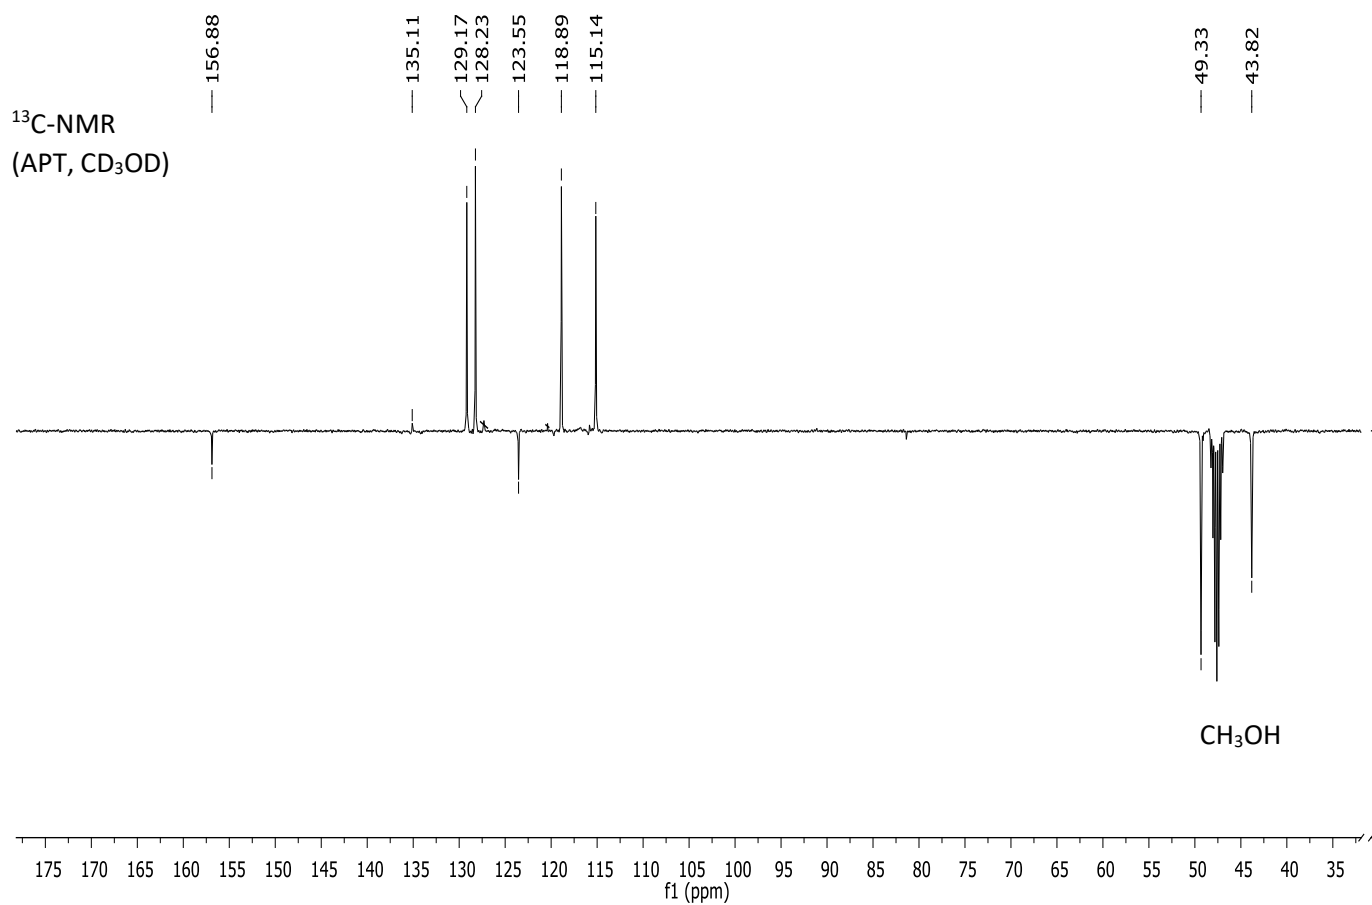

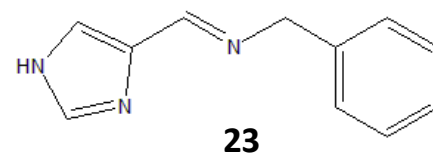

$^1\text{H-NMR}$  ( $\text{CD}_3\text{OD}$ )

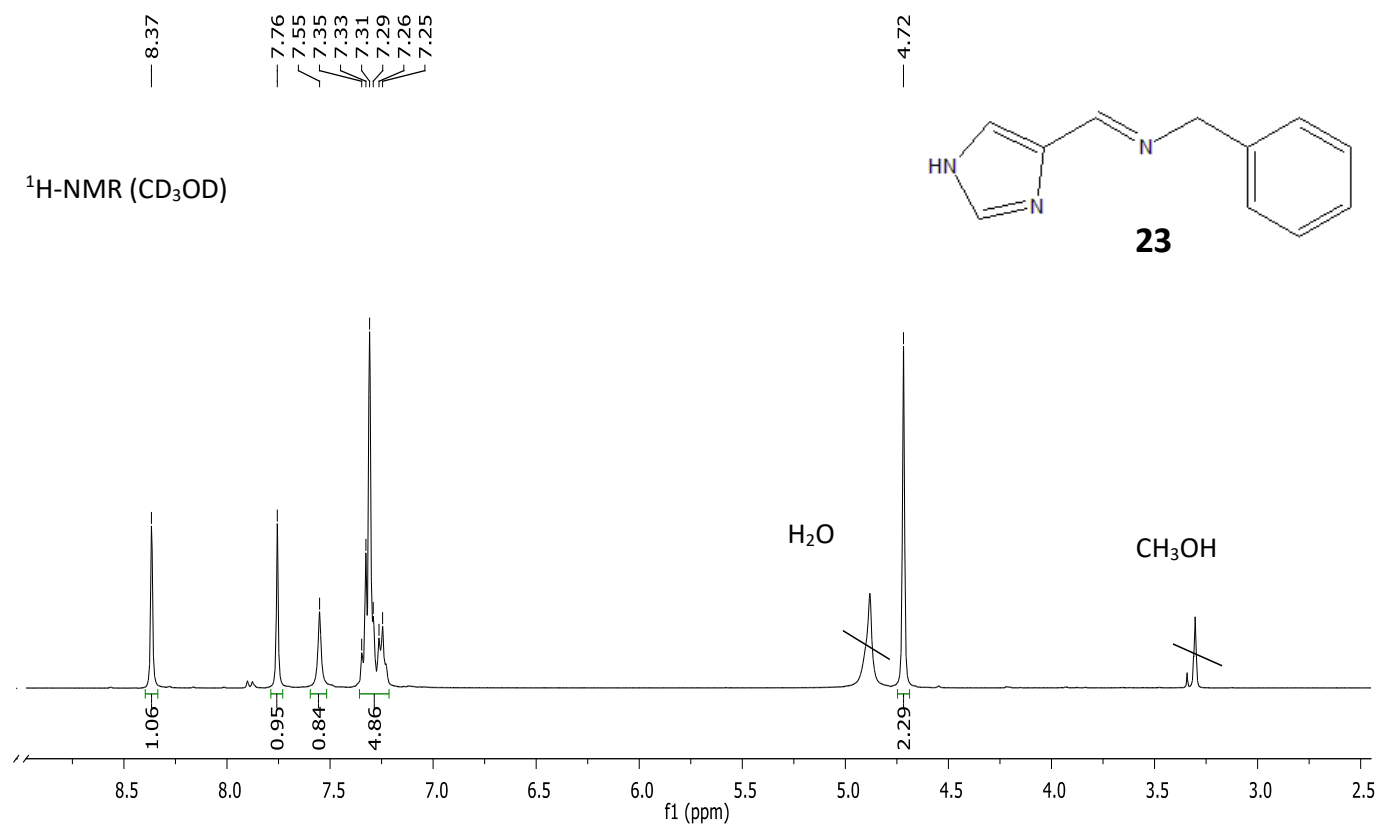

$^{13}\text{C-NMR}$   
(Proton decoupled,  
 $\text{CD}_3\text{OD}$ )

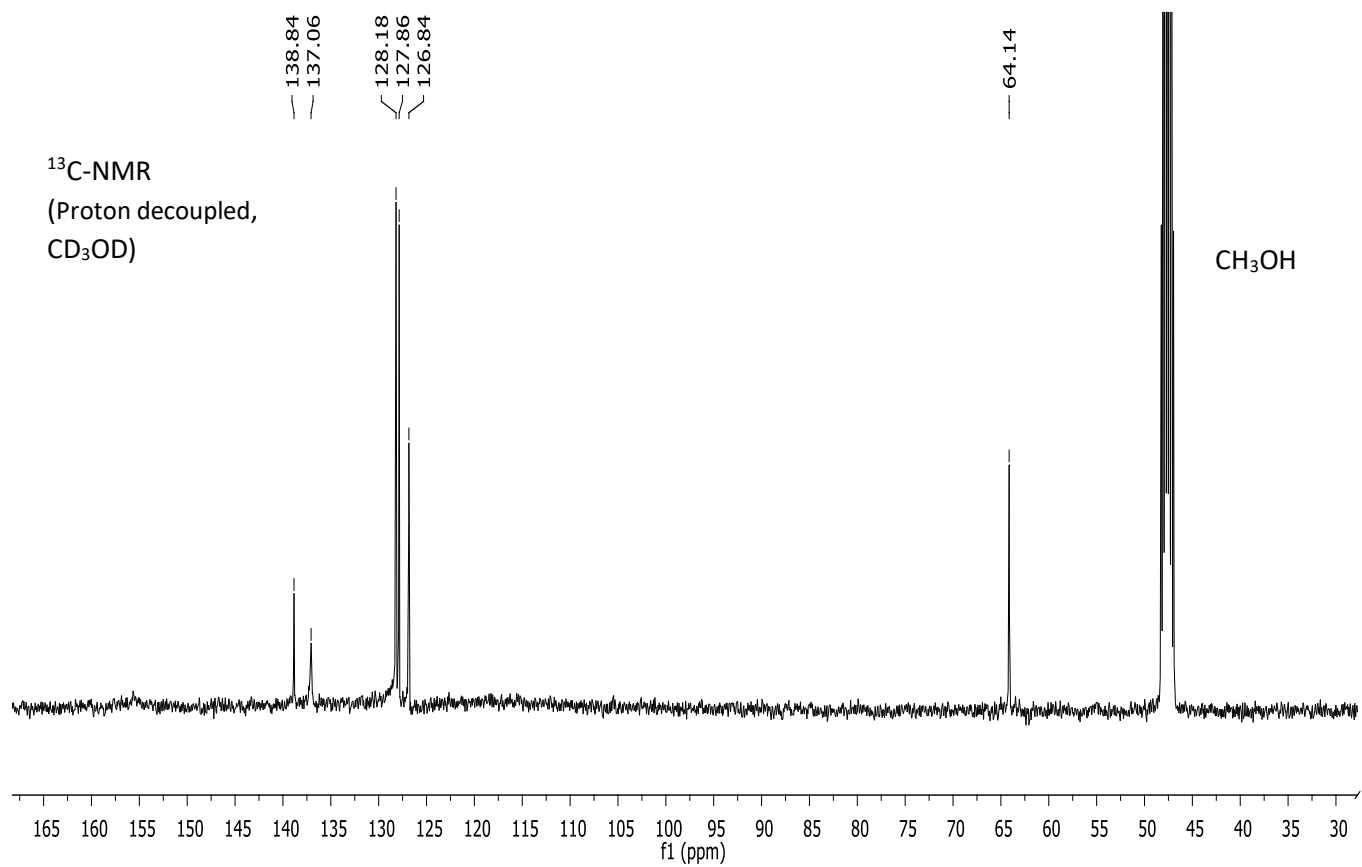

Supplement: s1 [file s1]
